# Supplementary material
Source: MDPI journal article supplement (https://www.mdpi.com/2073-4441/13/13/1848)
Supplement: s1 [file s1 › water-1218202-supplementary.pdf]

# Survey Frequency Tables—Cambodia Gender, Water and Poverty Survey

## Province

|                 |            | Basin location |          |           |            |
|-----------------|------------|----------------|----------|-----------|------------|
|                 |            | Overall        | Upstream | Midstream | Downstream |
| Total           | Wtd Base   | 812            | 27       | 427       | 358        |
|                 | Unwtd Base | 812            | 270      | 267       | 275        |
| Kampong Thom    | %          | 41             | 100      | 39        | 39         |
| Kampong Cham    | %          | 49             | 0        | 61        | 39         |
| Kampong Chhnang | %          | 10             | 0        | 0         | 23         |

## 23. What is the primary language spoken in your household?

|       |            | Basin location |          |           |            |
|-------|------------|----------------|----------|-----------|------------|
|       |            | Overall        | Upstream | Midstream | Downstream |
| Total | Wtd Base   | 812            | 27       | 427       | 358        |
|       | Unwtd Base | 812            | 270      | 267       | 275        |
| Khmer | %          | 100            | 94       | 100       | 100        |
| Cham  | %          |                | 6        | 0         | 0          |

## 24. How would you classify your household, in terms of leadership?

|                                           |            | Basin location |          |           |            |
|-------------------------------------------|------------|----------------|----------|-----------|------------|
|                                           |            | Overall        | Upstream | Midstream | Downstream |
| Total                                     | Wtd Base   | 812            | 27       | 427       | 358        |
|                                           | Unwtd Base | 812            | 270      | 267       | 275        |
| Man as head, with spouse                  | %          | 76             | 77       | 79        | 72         |
| Man as head, divorced, alone or widowed   | %          | 1              |          | 0         | 2          |
| Woman as head, with spouse                | %          | 10             | 7        | 10        | 10         |
| Woman as head, divorced, alone or widowed | %          | 9              | 6        | 9         | 10         |
| Woman as head, with spouse away from home | %          | 2              | 1        | 2         | 2          |
| Husband and wife as heads of household    | %          | 1              | 6        |           | 2          |
| I don't know                              | %          |                |          | 0         | 1          |
| Other:                                    | %          |                | 1        | 0         | 1          |

## 25. Who manages the money for the household?

|  | Basin location |
|--|----------------|
|--|----------------|

|                           |            | Overall | Upstream | Midstream | Downstream |
|---------------------------|------------|---------|----------|-----------|------------|
| Total                     | Wtd Base   | 812     | 27       | 427       | 358        |
|                           | Unwtd Base | 812     | 270      | 267       | 275        |
| Male household head       | %          | 21      | 21       | 19        | 24         |
| Other                     | %          |         | 0        | 0         | 1          |
| Female household head     | %          | 14      | 10       | 16        | 13         |
| Wife of household head    | %          | 52      | 63       | 53        | 49         |
| Husband of household head | %          | 2       | 1        | 2         | 3          |
| Other adult male          | %          | 2       | 1        | 2         | 2          |
| Other adult female        | %          | 7       | 2        | 8         | 6          |
| Elderly male              | %          |         |          |           | 0          |
| Elderly female            | %          | 1       | 1        |           | 2          |
| Male child                | %          |         | 0        |           | 0          |

**27. Did any of your household members move out of the village in the last 5 years**

|                                                |            | Basin location |          |           |            |
|------------------------------------------------|------------|----------------|----------|-----------|------------|
|                                                |            | Overall        | Upstream | Midstream | Downstream |
| Total                                          | Wtd Base   | 812            | 27       | 427       | 358        |
|                                                | Unwtd Base | 812            | 270      | 267       | 275        |
| Yes, moved permanently                         | %          | 28             | 23       | 26        | 31         |
| Yes, moved for a short period and will be back | %          | 25             | 7        | 28        | 21         |
| Yes, moved but now they are back               | %          | 4              | 3        | 5         | 2          |
| No                                             | %          | 43             | 67       | 40        | 45         |
| I don't know                                   | %          |                |          | 0         | 0          |

**28. Why did they move?**

|                                                    |            | Basin location |          |           |            |
|----------------------------------------------------|------------|----------------|----------|-----------|------------|
|                                                    |            | Overall        | Upstream | Midstream | Downstream |
| Total                                              | Wtd Base   | 431            | 8        | 235       | 188        |
|                                                    | Unwtd Base | 376            | 85       | 147       | 144        |
| Study                                              | %          | 13             | 20       | 15        | 11         |
| Marriage                                           | %          | 25             | 28       | 25        | 26         |
| Better options for work elsewhere                  | %          | 57             | 47       | 57        | 58         |
| Lack of Land/Plots in this village                 | %          | 1              | 1        | 1         | 0          |
| Natural hazards (droughts, floods) in this village | %          |                | 0        | 0         | 1          |
| Moved to live with family                          | %          | 2              | 0        | 2         | 2          |
| Other                                              | %          | 1              | 4        | 1         | 2          |

**29. Can you read Khmer?**

|  |  | Basin location |
|--|--|----------------|
|--|--|----------------|

|                 |            | Overall | Upstream | Midstream | Downstream |
|-----------------|------------|---------|----------|-----------|------------|
| Total           | Wtd Base   | 812     | 27       | 427       | 358        |
|                 | Unwtd Base | 812     | 270      | 267       | 275        |
| Yes, completely | %          | 32      | 23       | 28        | 37         |
| Yes, somewhat   | %          | 40      | 35       | 43        | 37         |
| No              | %          | 28      | 43       | 29        | 26         |

**29. Can you write Khmer?**

|                 |            | Basin location |          |           |            |
|-----------------|------------|----------------|----------|-----------|------------|
|                 |            | Overall        | Upstream | Midstream | Downstream |
| Total           | Wtd Base   | 812            | 27       | 427       | 358        |
|                 | Unwtd Base | 812            | 270      | 267       | 275        |
| Yes, completely | %          | 32             | 22       | 29        | 36         |
| Yes, somewhat   | %          | 38             | 34       | 40        | 37         |
| No              | %          | 30             | 44       | 31        | 27         |

**30. Up to what grade did you study?**

|                     |            | Basin location |          |           |            |
|---------------------|------------|----------------|----------|-----------|------------|
|                     |            | Overall        | Upstream | Midstream | Downstream |
| Total               | Wtd Base   | 812            | 27       | 427       | 358        |
|                     | Unwtd Base | 812            | 270      | 267       | 275        |
| Graduate            | %          | 1              | 1        | 0         | 2          |
| High school         | %          | 6              | 11       | 4         | 8          |
| Secondary school    | %          | 19             | 17       | 19        | 20         |
| Primary school      | %          | 55             | 38       | 57        | 54         |
| No formal education | %          | 18             | 33       | 20        | 15         |
| Prefer not to say   | %          |                |          | 0         | 0          |

**31. Up to what grade did your household head study?**

|                     |            | Basin location |          |           |            |
|---------------------|------------|----------------|----------|-----------|------------|
|                     |            | Overall        | Upstream | Midstream | Downstream |
| Total               | Wtd Base   | 335            | 12       | 162       | 162        |
|                     | Unwtd Base | 343            | 118      | 101       | 124        |
| Graduate            | %          | 1              | 1        | 0         | 2          |
| High school         | %          | 6              | 10       | 5         | 6          |
| Secondary school    | %          | 18             | 13       | 18        | 18         |
| Primary school      | %          | 51             | 39       | 55        | 48         |
| No formal education | %          | 17             | 30       | 13        | 19         |
| Prefer not to say   | %          |                | 2        | 0         | 0          |

|            |   |   |   |   |   |
|------------|---|---|---|---|---|
| Don't know | % | 8 | 6 | 9 | 6 |
|------------|---|---|---|---|---|

**32. What were the main activities you did in the last twelve months to contribute to the household?**

|                                                                         |            | Basin location |          |           |            |
|-------------------------------------------------------------------------|------------|----------------|----------|-----------|------------|
|                                                                         |            | Overall        | Upstream | Midstream | Downstream |
| Total                                                                   | Wtd Base   | 812            | 27       | 427       | 358        |
|                                                                         | Unwtd Base | 812            | 270      | 267       | 275        |
| Farming for income                                                      | %          | 25             | 29       | 26        | 23         |
| Raising livestock                                                       | %          | 11             | 13       | 11        | 11         |
| Housework (cooking, cleaning, watching children)                        | %          | 14             | 13       | 15        | 14         |
| Domestic work (cooking, cleaning, watching children) in someone's house | %          | 1              | 1        | 1         | 1          |
| Other                                                                   | %          | 3              | 3        | 2         | 4          |
| Farming for subsistence                                                 | %          | 17             | 12       | 17        | 18         |
| Salaried job                                                            | %          | 6              | 2        | 4         | 8          |
| Labor work                                                              | %          | 10             | 13       | 12        | 7          |
| Mining                                                                  | %          |                |          | 0         | 0          |
| Fishing                                                                 | %          | 3              | 1        | 3         | 3          |
| Timber extraction                                                       | %          |                | 1        | 1         | 0          |
| Street vendor                                                           | %          | 2              | 1        | 3         | 1          |
| Grocery or other merchandise business                                   | %          | 8              | 9        | 6         | 12         |

**33. Are you satisfied with the activities you do to contribute to the household?**

|                                                                                 |            | Basin location |          |           |            |
|---------------------------------------------------------------------------------|------------|----------------|----------|-----------|------------|
|                                                                                 |            | Overall        | Upstream | Midstream | Downstream |
| Total                                                                           | Wtd Base   | 812            | 27       | 427       | 358        |
|                                                                                 | Unwtd Base | 812            | 270      | 267       | 275        |
| Yes                                                                             | %          | 87             | 87       | 85        | 89         |
| No, I would like to do something else instead (study, other kind of work, etc.) | %          | 3              | 4        | 3         | 2          |
| No, I would like to contribute more                                             | %          | 3              | 4        | 4         | 2          |
| No, my contribution could not fulfil my household needs                         | %          | 6              | 6        | 6         | 5          |
| No, (other reason)                                                              | %          | 2              | 0        | 2         | 1          |

**34. Who is/are the primary income earner(s) in your household?**

|                     |            | Basin location |          |           |            |
|---------------------|------------|----------------|----------|-----------|------------|
|                     |            | Overall        | Upstream | Midstream | Downstream |
| Total               | Wtd Base   | 812            | 27       | 427       | 358        |
|                     | Unwtd Base | 812            | 270      | 267       | 275        |
| Male household head | %          | 33             | 42       | 33        | 33         |

|                           |   |    |    |    |    |
|---------------------------|---|----|----|----|----|
| Female child              | % |    | 1  |    |    |
| No one                    | % |    |    |    | 0  |
| Female household head     | % | 8  | 5  | 7  | 8  |
| Wife of household head    | % | 24 | 31 | 23 | 23 |
| Husband of household head | % | 4  | 2  | 4  | 4  |
| Other adult male          | % | 16 | 9  | 16 | 15 |
| Other adult female        | % | 14 | 7  | 13 | 15 |
| Elderly male              | % |    | 1  |    |    |
| Elderly female            | % | 1  | 1  | 1  | 1  |
| Male child                | % |    | 1  |    |    |

**35. What were the main activities that brought income to the household in the last 12 months?**

|                                                                |            | Basin location |          |           |            |
|----------------------------------------------------------------|------------|----------------|----------|-----------|------------|
|                                                                |            | Overall        | Upstream | Midstream | Downstream |
| Total                                                          |            |                |          |           |            |
|                                                                | Wtd Base   | 812            | 27       | 427       | 358        |
|                                                                | Unwtd Base | 812            | 270      | 267       | 275        |
| Salaried job                                                   | %          | 18             | 9        | 16        | 21         |
| Transportation                                                 | %          | 1              | 1        |           | 1          |
| Street vendor                                                  | %          | 3              | 2        | 4         | 2          |
| Rents, Interest                                                | %          |                | 0        |           |            |
| Pensions                                                       | %          |                |          | 0         | 1          |
| Income from family members living elsewhere/remittances        | %          | 9              | 3        | 9         | 8          |
| I don't know                                                   | %          |                | 0        |           | 0          |
| Other                                                          | %          | 3              | 6        | 3         | 3          |
| Sale of agricultural products                                  | %          | 28             | 36       | 30        | 26         |
| Sale of standing cattle and other farm animals                 | %          | 6              | 5        | 7         | 6          |
| Sale of animal products (meat, milk, eggs, honey, animal skin) | %          |                |          |           |            |
| Fishing                                                        | %          | 4              | 1        | 3         | 5          |
| Sale of metals and/or minerals                                 | %          |                |          | 0         | 0          |
| Sale of timber                                                 | %          |                | 2        |           | 0          |
| Grocery or other merchandise business                          | %          | 11             | 13       | 8         | 15         |
| Day labor work                                                 | %          | 15             | 23       | 18        | 11         |

**36. What was your household's MAIN water source for drinking water in the last 12 months in dry season?**

|                                   |            | Basin location |          |           |            |
|-----------------------------------|------------|----------------|----------|-----------|------------|
|                                   |            | Overall        | Upstream | Midstream | Downstream |
| Total                             |            |                |          |           |            |
|                                   | Wtd Base   | 812            | 27       | 427       | 358        |
|                                   | Unwtd Base | 812            | 270      | 267       | 275        |
| Piped into dwelling               | %          | 3              | 0        | 3         | 4          |
| Piped into compound, yard or plot | %          | 1              | 0        |           | 3          |
| Piped to neighbour                | %          |                | 0        | 0         |            |
| Public tap / standpipe            | %          | 3              | 0        | 5         | 0          |

|                                                                           |   |    |    |    |    |
|---------------------------------------------------------------------------|---|----|----|----|----|
| Borehole or tubewell                                                      | % | 20 | 19 | 26 | 12 |
| Protected well                                                            | % | 23 | 23 | 31 | 13 |
| Unprotected well                                                          | % | 13 | 34 | 18 | 6  |
| Rainwater collection                                                      | % | 4  | 1  | 0  | 9  |
| Tanker-truck                                                              | % | 3  | 0  | 0  | 7  |
| Cart with small tank / drum                                               | % | 1  | 0  | 0  | 2  |
| Bottled water                                                             | % | 25 | 14 | 16 | 35 |
| Surface water (river, stream, dam, lake, pond, canal, irrigation channel) | % | 4  | 5  |    | 9  |
| Other                                                                     | % |    | 4  | 0  |    |

**36. What was your household's MAIN water source for drinking water in the last 12 months in dry season?**

|                                                                           |            | Basin location |          |           |            |
|---------------------------------------------------------------------------|------------|----------------|----------|-----------|------------|
|                                                                           |            | Overall        | Upstream | Midstream | Downstream |
| Total                                                                     | Wtd Base   | 812            | 27       | 427       | 358        |
|                                                                           | Unwtd Base | 812            | 270      | 267       | 275        |
| Piped into dwelling                                                       | %          | 3              | 0        | 3         | 4          |
| Piped into compound, yard or plot                                         | %          | 1              | 0        | 0         | 2          |
| Public tap / standpipe                                                    | %          | 3              |          | 5         | 0          |
| Borehole or tubewell                                                      | %          | 19             | 19       | 25        | 12         |
| Protected well                                                            | %          | 22             | 21       | 31        | 11         |
| Unprotected well                                                          | %          | 12             | 29       | 17        | 5          |
| Rainwater collection                                                      | %          | 16             | 13       | 3         | 32         |
| Tanker-truck                                                              | %          |                | 0        | 0         | 1          |
| Bottled water                                                             | %          | 21             | 14       | 15        | 28         |
| Surface water (river, stream, dam, lake, pond, canal, irrigation channel) | %          | 2              | 1        | 0         | 4          |
| Other                                                                     | %          |                | 2        | 0         |            |

**37. Do you treat this water before drinking?**

|       |            | Basin location |          |           |            |
|-------|------------|----------------|----------|-----------|------------|
|       |            | Overall        | Upstream | Midstream | Downstream |
| Total | Wtd Base   | 812            | 27       | 427       | 358        |
|       | Unwtd Base | 812            | 270      | 267       | 275        |
| Yes   | %          | 62             | 63       | 65        | 58         |
| No    | %          | 38             | 37       | 35        | 42         |

**38. How do you treat this water before drinking?**

|       |          | Basin location |          |           |            |
|-------|----------|----------------|----------|-----------|------------|
|       |          | Overall        | Upstream | Midstream | Downstream |
| Total | Wtd Base | 502            | 17       | 277       | 208        |

|                        |       |     |     |     |     |
|------------------------|-------|-----|-----|-----|-----|
|                        | Unwtd | 504 | 171 | 173 | 160 |
|                        | Base  |     |     |     |     |
| By boiling             | %     | 52  | 48  | 42  | 66  |
| Adding alum            | %     |     | 0   | 0   | 1   |
| Adding Bleach/Chlorine | %     | 1   | 0   | 1   | 1   |
| Filtering using Cloth  | %     | 1   | 0   | 1   | 1   |
| Using Water Filter     | %     | 46  | 52  | 57  | 31  |
| Other                  | %     |     | 0   | 0   | 1   |

**39. Has your household had enough water for drinking water in the last 12 months?**

|       |          | Basin location |          |           |                |
|-------|----------|----------------|----------|-----------|----------------|
|       |          | Overall        | Upstream | Midstream | Downstre<br>am |
| Total | Wtd Base | 812            | 27       | 427       | 358            |
|       | Unwtd    | 812            | 270      | 267       | 275            |
|       | Base     |                |          |           |                |
| Yes   | %        | 96             | 81       | 97        | 97             |
| No    | %        | 4              | 19       | 3         | 3              |

**40. During which months was the availability of water from the primary source not sufficient for drinking water?**

|        |          | Basin location |          |           |                |
|--------|----------|----------------|----------|-----------|----------------|
|        |          | Overall        | Upstream | Midstream | Downstre<br>am |
| Total  | Wtd Base | 31             | 5        | 14        | 12             |
|        | Unwtd    | 69             | 51       | 9         | 9              |
|        | Base     |                |          |           |                |
| Oct/18 | %        |                | 1        | 0         | 0              |
| Jul/19 | %        |                | 1        | 0         | 0              |
| Aug/19 | %        |                | 1        | 0         | 0              |
| Nov/18 | %        | 2              | 2        | 4         | 0              |
| Dec/18 | %        | 2              | 3        | 4         | 0              |
| Jan/19 | %        | 8              | 6        | 8         | 9              |
| Feb/19 | %        | 15             | 11       | 17        | 14             |
| Mar/19 | %        | 21             | 20       | 21        | 23             |
| Apr/19 | %        | 30             | 31       | 25        | 36             |
| May/19 | %        | 17             | 18       | 17        | 18             |
| Jun/19 | %        | 3              | 6        | 4         | 0              |

**41. What was your household's main water source for other domestic uses in the last 12 months : Dry season**

|                                   |          | Basin location |          |           |                |
|-----------------------------------|----------|----------------|----------|-----------|----------------|
|                                   |          | Overall        | Upstream | Midstream | Downstre<br>am |
| Total                             | Wtd Base | 812            | 27       | 427       | 358            |
|                                   | Unwtd    | 812            | 270      | 267       | 275            |
|                                   | Base     |                |          |           |                |
| Piped into dwelling               | %        | 8              |          | 4         | 13             |
| Piped into compound, yard or plot | %        | 2              | 0        | 0         | 5              |

|                                                                           |   |    |    |    |    |
|---------------------------------------------------------------------------|---|----|----|----|----|
| Piped to neighbour                                                        | % |    | 0  | 0  | 1  |
| Public tap / standpipe                                                    | % | 2  | 0  | 4  | 0  |
| Borehole or tubewell                                                      | % | 25 | 19 | 30 | 19 |
| Protected well                                                            | % | 32 | 32 | 40 | 22 |
| Unprotected well                                                          | % | 17 | 37 | 21 | 10 |
| Tanker-truck                                                              | % | 2  | 0  | 0  | 5  |
| Cart with small tank / drum                                               | % | 1  | 0  | 0  | 3  |
| Surface water (river, stream, dam, lake, pond, canal, irrigation channel) | % | 10 | 7  |    | 22 |
| Other                                                                     | % | 1  | 4  |    |    |

**41. What was your household's main water source for other domestic uses in the last 12 months : Wet season**

|                                                                           |            | Basin location |          |           |            |
|---------------------------------------------------------------------------|------------|----------------|----------|-----------|------------|
|                                                                           |            | Overall        | Upstream | Midstream | Downstream |
| Total                                                                     | Wtd Base   | 812            | 27       | 427       | 358        |
|                                                                           | Unwtd Base | 812            | 270      | 267       | 275        |
| Piped into dwelling                                                       | %          | 7              |          | 4         | 11         |
| Piped into compound, yard or plot                                         | %          | 2              | 0        |           | 4          |
| Piped to neighbour                                                        | %          |                | 0        | 0         | 1          |
| Public tap / standpipe                                                    | %          | 2              | 0        | 4         | 0          |
| Borehole or tubewell                                                      | %          | 23             | 17       | 29        | 17         |
| Protected well                                                            | %          | 30             | 30       | 39        | 20         |
| Unprotected well                                                          | %          | 16             | 34       | 21        | 10         |
| Rainwater collection                                                      | %          | 9              | 10       | 3         | 16         |
| Tanker-truck                                                              | %          | 1              | 0        | 0         | 1          |
| Cart with small tank / drum                                               | %          | 1              | 0        | 0         | 2          |
| Surface water (river, stream, dam, lake, pond, canal, irrigation channel) | %          | 8              | 5        | 0         | 17         |
| Other                                                                     | %          |                | 3        |           |            |

**42. Has your household had Enough water for other domestic uses in the last 12 months?**

|       |            | Basin location |          |           |            |
|-------|------------|----------------|----------|-----------|------------|
|       |            | Overall        | Upstream | Midstream | Downstream |
| Total | Wtd Base   | 812            | 27       | 427       | 358        |
|       | Unwtd Base | 812            | 270      | 267       | 275        |
| Yes   | %          | 93             | 77       | 93        | 94         |
| No    | %          | 7              | 23       | 7         | 6          |

**43. During which months was the availability of water from the primary source not sufficient for other domestic uses?**

|  | Basin location |
|--|----------------|
|--|----------------|

|              |            | Overall | Upstream | Midstream | Downstream |
|--------------|------------|---------|----------|-----------|------------|
| Total        | Wtd Base   | 59      | 6        | 32        | 21         |
|              | Unwtd Base | 98      | 62       | 20        | 16         |
| Oct/18       | %          |         | 1        | 0         | 0          |
| Jul/19       | %          |         | 1        | 0         | 0          |
| Aug/19       | %          | 1       | 1        | 0         | 3          |
| Sep/19       | %          | 1       | 1        | 0         | 3          |
| I don't know | %          | 1       | 0        | 0         | 3          |
| Nov/18       | %          | 2       | 2        | 2         | 3          |
| Dec/18       | %          | 3       | 3        | 4         | 3          |
| Jan/19       | %          | 6       | 6        | 6         | 5          |
| Feb/19       | %          | 9       | 10       | 10        | 8          |
| Mar/19       | %          | 22      | 21       | 24        | 19         |
| Apr/19       | %          | 30      | 31       | 30        | 30         |
| May/19       | %          | 19      | 17       | 20        | 19         |
| Jun/19       | %          | 5       | 7        | 4         | 5          |

**44. How long does it take (in minutes) to get to the water source, collect water, and return home?**

|            |            | Basin location |          |           |            |
|------------|------------|----------------|----------|-----------|------------|
|            |            | Overall        | Upstream | Midstream | Downstream |
| Total      | Wtd Base   | 812            | 27       | 427       | 358        |
|            | Unwtd Base | 812            | 270      | 267       | 275        |
| 0          | %          | 66             | 21       | 68        | 67         |
| 1          | %          | 6              | 1        | 9         | 3          |
| 2          | %          | 7              | 3        | 7         | 6          |
| 3          | %          | 3              | 7        | 2         | 3          |
| 4          | %          |                | 3        |           | 0          |
| 5          | %          | 8              | 21       | 7         | 8          |
| 6          | %          |                |          | 1         | 0          |
| 7          | %          |                | 1        | 1         | 0          |
| 10         | %          | 5              | 17       | 3         | 7          |
| 15         | %          | 1              | 3        |           | 1          |
| 16         | %          |                |          | 0         | 0          |
| 20         | %          | 1              | 6        | 1         | 1          |
| 30         | %          | 2              | 10       | 1         | 3          |
| 40         | %          |                | 1        | 0         | 0          |
| 60         | %          | 1              | 3        | 0         | 1          |
| 90         | %          |                |          | 0         | 0          |
| 120        | %          |                |          | 0         | 0          |
| Don't Know | %          |                | 1        | 0         | 1          |

**45. Who is responsible for collecting and ensuring there is enough water in your home for domestic use?**

| Basin location |
|----------------|
|----------------|

|                           |            | Overall | Upstream | Midstream | Downstream |
|---------------------------|------------|---------|----------|-----------|------------|
| Total                     | Wtd Base   | 812     | 27       | 427       | 358        |
|                           | Unwtd Base | 812     | 270      | 267       | 275        |
| Male household head       | %          | 32      | 40       | 32        | 31         |
| Female child              | %          | 3       | 7        | 3         | 2          |
| No one                    | %          | 3       | 0        | 2         | 4          |
| Other                     | %          |         | 0        | 0         |            |
| Female household head     | %          | 9       | 6        | 8         | 9          |
| Wife of household head    | %          | 25      | 27       | 25        | 26         |
| Husband of household head | %          | 3       | 2        | 3         | 3          |
| Other adult male          | %          | 10      | 6        | 11        | 9          |
| Other adult female        | %          | 8       | 5        | 8         | 8          |
| Elderly male              | %          | 1       | 1        | 1         | 1          |
| Elderly female            | %          | 2       | 1        | 2         | 2          |
| Male child                | %          | 4       | 7        | 5         | 3          |

**47. Does it take significantly longer to collect water in the wet season or dry season?**

|               |            | Basin location |          |           |            |
|---------------|------------|----------------|----------|-----------|------------|
|               |            | Overall        | Upstream | Midstream | Downstream |
| Total         | Wtd Base   | 275            | 21       | 138       | 117        |
|               | Unwtd Base | 386            | 210      | 86        | 90         |
| Wet           | %          | 1              | 4        | 1         | 1          |
| Dry           | %          | 27             | 59       | 14        | 38         |
| Same for both | %          | 71             | 37       | 85        | 60         |
| I don't know  | %          |                | 0        | 0         | 1          |

**48. Does your household pay for water for domestic use?**

|                                             |            | Basin location |          |           |            |
|---------------------------------------------|------------|----------------|----------|-----------|------------|
|                                             |            | Overall        | Upstream | Midstream | Downstream |
| Total                                       | Wtd Base   | 812            | 27       | 427       | 358        |
|                                             | Unwtd Base | 812            | 270      | 267       | 275        |
| yes, according to our amount of consumption | %          | 15             | 4        | 8         | 24         |
| yes, a standard fee                         | %          | 3              |          | 1         | 7          |
| yes, when I buy bottled or packaged water   | %          | 4              | 3        | 3         | 6          |
| yes, to pump water (gasoline)               | %          | 4              | 19       | 3         | 5          |
| yes, to pump water (electricity)            | %          | 56             | 24       | 65        | 47         |
| No                                          | %          | 17             | 49       | 19        | 11         |
| I don't know                                | %          |                | 0        | 0         | 1          |

**49. How much did your household pay for domestic water in the last 12 months?**

| Basin location |
|----------------|
|----------------|

|           |          | Overall | Upstream | Midstream | Downstre<br>am |
|-----------|----------|---------|----------|-----------|----------------|
| Total     | Wtd Base | 675     | 13       | 344       | 318            |
|           | Unwtd    | 596     | 137      | 215       | 244            |
|           | Base     |         |          |           |                |
| 2000.00   | %        | 1       | 0        | 0         | 1              |
| 3000.00   | %        | 1       | 0        | 0         | 1              |
| 6000.00   | %        | 1       | 0        | 0         | 1              |
| 7000.00   | %        | 3       | 0        | 2         | 1              |
| 9000.00   | %        | 1       | 0        | 0         | 1              |
| 10000.00  | %        | 8       | 0        | 2         | 7              |
| 12000.00  | %        | 1       | 0        | 0         | 1              |
| 15000.00  | %        | 4       | 0        | 0         | 4              |
| 16000.00  | %        |         |          | 0         | 0              |
| 18000.00  | %        | 3       |          | 0         | 3              |
| 20000.00  | %        | 9       | 0        | 6         | 3              |
| 23000.00  | %        | 1       | 0        | 0         | 1              |
| 24000.00  | %        | 3       |          | 2         | 1              |
| 25000.00  | %        | 1       | 0        | 0         | 1              |
| 30000.00  | %        | 12      |          | 6         | 5              |
| 33600.00  | %        | 2       | 0        | 2         | 0              |
| 35000.00  | %        | 3       | 0        | 3         | 0              |
| 36000.00  | %        | 11      |          | 3         | 8              |
| 40000.00  | %        | 14      | 0        | 10        | 4              |
| 42000.00  | %        | 2       |          | 2         | 0              |
| 44000.00  | %        | 1       | 0        | 0         | 1              |
| 48000.00  | %        | 7       | 0        | 5         | 3              |
| 50000.00  | %        | 19      | 0        | 10        | 9              |
| 52000.00  | %        |         |          | 0         | 0              |
| 54000.00  | %        | 1       |          | 0         | 1              |
| 56000.00  | %        | 1       | 0        | 0         | 1              |
| 57600.00  | %        | 1       | 0        | 0         | 1              |
| 58000.00  | %        | 2       | 0        | 2         | 0              |
| 60000.00  | %        | 51      |          | 40        | 10             |
| 70000.00  | %        | 4       | 0        | 2         | 3              |
| 72000.00  | %        | 8       |          | 6         | 1              |
| 73200.00  | %        | 1       | 0        | 0         | 1              |
| 79200.00  | %        |         |          | 0         | 0              |
| 80000.00  | %        | 3       | 0        | 2         | 1              |
| 84000.00  | %        | 9       |          | 5         | 4              |
| 86000.00  | %        | 1       | 0        | 0         | 1              |
| 87000.00  | %        | 1       | 0        | 0         | 1              |
| 90000.00  | %        | 6       |          | 2         | 4              |
| 91200.00  | %        | 1       | 0        | 0         | 1              |
| 96000.00  | %        | 18      |          | 13        | 5              |
| 100000.00 | %        | 16      |          | 3         | 13             |
| 108000.00 | %        | 3       | 0        | 0         | 3              |
| 110000.00 | %        | 1       | 0        | 0         | 1              |
| 115200.00 | %        | 1       | 0        | 0         | 1              |
| 120000.00 | %        | 81      | 1        | 50        | 30             |

|           |   |    |   |    |    |
|-----------|---|----|---|----|----|
| 130000.00 | % | 1  | 0 | 0  | 1  |
| 140000.00 | % | 7  |   | 3  | 4  |
| 142000.00 | % | 1  | 0 | 0  | 1  |
| 144000.00 | % | 10 | 0 | 3  | 7  |
| 148800.00 | % |    |   | 0  | 0  |
| 150000.00 | % | 6  |   | 3  | 3  |
| 160000.00 | % | 6  | 0 | 6  | 0  |
| 168000.00 | % | 3  |   | 0  | 3  |
| 170000.00 | % | 2  | 0 | 2  | 0  |
| 180000.00 | % | 20 |   | 8  | 12 |
| 190000.00 | % | 2  | 0 | 2  | 0  |
| 192000.00 | % | 4  |   | 0  | 4  |
| 200000.00 | % | 7  | 0 | 2  | 5  |
| 204000.00 | % | 1  | 0 | 0  | 1  |
| 210000.00 | % | 1  |   | 0  | 1  |
| 216000.00 | % | 1  | 0 | 0  | 1  |
| 220000.00 | % | 7  | 0 | 5  | 3  |
| 225000.00 | % | 1  | 0 | 0  | 1  |
| 228000.00 | % | 1  | 0 | 0  | 1  |
| 230400.00 | % | 1  | 0 | 0  | 1  |
| 232000.00 | % |    |   | 0  | 0  |
| 240000.00 | % | 35 | 1 | 14 | 20 |
| 243000.00 | % | 2  | 0 | 2  | 0  |
| 244000.00 | % | 1  | 0 | 0  | 1  |
| 250000.00 | % | 4  |   | 2  | 3  |
| 259200.00 | % | 1  | 0 | 0  | 1  |
| 280000.00 | % | 1  | 0 | 0  | 1  |
| 288000.00 | % | 1  | 0 | 0  | 1  |
| 300000.00 | % | 8  |   | 2  | 7  |
| 310000.00 | % | 2  | 0 | 2  | 0  |
| 336000.00 | % | 1  | 0 | 0  | 1  |
| 350000.00 | % | 5  | 0 | 5  | 0  |
| 360000.00 | % | 8  | 1 | 3  | 4  |
| 384000.00 | % | 1  | 0 | 0  | 1  |
| 400000.00 | % | 1  |   | 0  | 1  |
| 414000.00 | % | 1  | 0 | 0  | 1  |
| 420000.00 | % | 2  |   | 0  | 1  |
| 432000.00 | % |    |   | 0  | 0  |
| 450000.00 | % | 1  | 0 | 0  | 1  |
| 480000.00 | % | 13 | 1 | 5  | 8  |
| 500000.00 | % | 6  |   | 3  | 3  |
| 540000.00 | % | 1  |   | 0  | 1  |
| 552000.00 | % | 1  | 0 | 0  | 1  |
| 576000.00 | % |    |   | 0  | 0  |
| 600000.00 | % | 11 |   | 6  | 4  |
| 620000.00 | % |    |   | 0  | 0  |
| 648000.00 | % |    |   | 0  | 0  |
| 650000.00 | % | 2  | 0 | 2  | 0  |
| 652800.00 | % | 1  | 0 | 0  | 1  |

|                                                               |   |        |        |        |        |
|---------------------------------------------------------------|---|--------|--------|--------|--------|
| 696000.00                                                     | % | 1      | 0      | 0      | 1      |
| 720000.00                                                     | % | 7      | 1      | 2      | 4      |
| 730000.00                                                     | % |        |        | 0      | 0      |
| 760000.00                                                     | % |        |        | 0      | 0      |
| 792000.00                                                     | % |        |        | 0      | 0      |
| 840000.00                                                     | % | 2      |        | 0      | 1      |
| 936000.00                                                     | % |        |        | 0      | 0      |
| 960000.00                                                     | % |        |        | 0      | 0      |
| 1000000.00                                                    | % |        |        | 0      | 0      |
| 1068000.00                                                    | % | 1      | 0      | 0      | 1      |
| 1080000.00                                                    | % |        |        | 0      | 0      |
| 1140000.00                                                    | % |        |        | 0      | 0      |
| 1200000.00                                                    | % | 3      | 1      | 0      | 3      |
| 1260000.00                                                    | % |        |        | 0      | 0      |
| 1440000.00                                                    | % | 1      |        | 0      | 1      |
| 1800000.00                                                    | % | 2      | 0      | 2      | 0      |
| 2880000.00                                                    | % | 1      | 0      | 0      | 1      |
| 3801600.00                                                    | % | 1      | 0      | 0      | 1      |
| 3840000.00                                                    | % | 1      | 0      | 0      | 1      |
| 6000000.00                                                    | % | 1      | 0      | 0      | 1      |
| No expense                                                    | % | 1      | 0      | 0      | 1      |
| Don't Know                                                    | % | 132    | 1      | 88     | 43     |
| Household pay for domestic water in the last 12 months : riel |   | 220104 | 414000 | 155248 | 271977 |
| AVERAGE                                                       |   |        |        |        |        |

**50. What type of problems do you/your household member face in collecting water for all domestic uses?**

|                                                  |            | Basin location |          |           |            |
|--------------------------------------------------|------------|----------------|----------|-----------|------------|
|                                                  |            | Overall        | Upstream | Midstream | Downstream |
| Total                                            | Wtd Base   | 812            | 27       | 427       | 358        |
|                                                  | Unwtd Base | 812            | 270      | 267       | 275        |
| No Problem                                       | %          | 64             | 26       | 76        | 55         |
| Water dries up in dry season/particular season   | %          | 2              | 5        | 2         | 2          |
| Unable to afford                                 | %          |                |          | 0         | 1          |
| Poor water quality for drinking                  | %          | 5              | 10       | 1         | 8          |
| Water is cloudy                                  | %          | 10             | 24       | 6         | 12         |
| Poor taste/smell                                 | %          | 6              | 10       | 5         | 7          |
| I don't know                                     | %          |                |          | 1         | 0          |
| Other                                            | %          | 2              | 2        | 2         | 2          |
| Infrastructure not working                       | %          | 2              | 2        | 2         | 1          |
| Unreliable supply (for piped connections only)   | %          | 1              | 0        | 0         | 1          |
| Not enough water                                 | %          | 4              | 10       | 3         | 5          |
| Not easy to access                               | %          | 1              | 1        | 1         | 1          |
| Submerged due to inundation/ flood/water logging | %          |                |          |           |            |
| Owner does not permit                            | %          |                |          | 0         | 0          |
| Water is saline/brackish                         | %          | 2              | 4        | 0         | 4          |
| Too far to collect                               | %          | 1              | 5        |           | 2          |

**51. Have you seen changes in your main water source, the last 5 years?**

|              |            | Basin location |          |           |            |
|--------------|------------|----------------|----------|-----------|------------|
|              |            | Overall        | Upstream | Midstream | Downstream |
| Total        | Wtd Base   | 812            | 27       | 427       | 358        |
|              | Unwtd Base | 812            | 270      | 267       | 275        |
| Yes          | %          | 32             | 44       | 28        | 35         |
| No           | %          | 67             | 52       | 71        | 63         |
| I don't know | %          | 1              | 4        |           | 2          |

**52. If yes, what are the change you have seen?**

|                                 |            | Basin location |          |           |            |
|---------------------------------|------------|----------------|----------|-----------|------------|
|                                 |            | Overall        | Upstream | Midstream | Downstream |
| Total                           | Wtd Base   | 258            | 12       | 122       | 125        |
|                                 | Unwtd Base | 292            | 120      | 76        | 96         |
| Degrading water quality         | %          | 30             | 45       | 26        | 31         |
| Water is available more often   | %          | 2              | 0        | 2         | 1          |
| Other                           | %          | 3              | 3        | 4         | 3          |
| Improving water quality         | %          | 11             | 1        | 10        | 12         |
| Decreasing quantity             | %          | 21             | 36       | 21        | 19         |
| Increasing quantity             | %          | 8              | 1        | 11        | 5          |
| Decreasing price                | %          | 2              | 1        | 2         | 3          |
| Increasing price                | %          | 4              | 0        | 2         | 5          |
| Improved infrastructure         | %          | 17             | 5        | 19        | 17         |
| Degrading infrastructure        | %          | 1              | 2        | 2         | 1          |
| Water is unavailable more often | %          | 2              | 6        | 0         | 3          |

**53. What do you attribute these changes to?**

|                               |            | Basin location |          |           |            |
|-------------------------------|------------|----------------|----------|-----------|------------|
|                               |            | Overall        | Upstream | Midstream | Downstream |
| Total                         | Wtd Base   | 258            | 12       | 122       | 125        |
|                               | Unwtd Base | 292            | 120      | 76        | 96         |
| Increased mining activity     | %          | 1              | 8        | 0         | 1          |
| More people using the source  | %          | 14             | 15       | 11        | 16         |
| Fewer people using the source | %          | 2              | 1        | 1         | 3          |
| I don't know                  | %          | 16             | 14       | 16        | 16         |
| Other                         | %          | 11             | 21       | 8         | 13         |
| Agricultural pollution        | %          | 4              | 6        | 4         | 5          |
| Increased agricultural land   | %          | 5              | 2        | 6         | 5          |
| Land Concessions              | %          |                | 0        | 1         | 0          |
| Poor maintenance              | %          | 8              | 23       | 6         | 9          |

|                                                          |   |    |   |    |    |
|----------------------------------------------------------|---|----|---|----|----|
| Improved maintenance                                     | % | 9  | 1 | 10 | 9  |
| Poor water management                                    | % | 5  | 3 | 6  | 5  |
| Improved water management                                | % | 8  | 1 | 7  | 9  |
| My household invested time/money in improving the source | % | 17 | 6 | 25 | 10 |

**54. What do you think are the main problems regarding water for homes, in your community/area?**

|                                                         |            | Basin location |          |           |            |
|---------------------------------------------------------|------------|----------------|----------|-----------|------------|
|                                                         |            | Overall        | Upstream | Midstream | Downstream |
| Total                                                   | Wtd Base   | 812            | 27       | 427       | 358        |
|                                                         | Unwtd Base | 812            | 270      | 267       | 275        |
| Insufficient supply                                     | %          | 10             | 20       | 8         | 11         |
| I don't know                                            | %          | 23             | 16       | 22        | 25         |
| Other                                                   | %          | 35             | 15       | 45        | 27         |
| Long distances to water sources                         | %          | 7              | 13       | 2         | 10         |
| Sources of water contaminated by mining                 | %          |                | 6        | 0         |            |
| Sources of water contaminated by wastewater (feces)     | %          | 2              | 2        | 2         | 3          |
| Sources of water contaminated by agricultural chemicals | %          | 1              | 2        |           | 2          |
| Sources of water contained arsenic                      | %          | 5              | 7        | 5         | 4          |
| Water scarcity in current sources                       | %          | 5              | 3        | 5         | 5          |
| Uneven distribution of water in homes                   | %          | 2              | 0        | 2         | 2          |
| Poorly functioning wells                                | %          | 9              | 16       | 8         | 10         |

**55. Has your household invested time and/or money into improving the infrastructure of your domestic water supply?**

|              |            | Basin location |          |           |            |
|--------------|------------|----------------|----------|-----------|------------|
|              |            | Overall        | Upstream | Midstream | Downstream |
| Total        | Wtd Base   | 812            | 27       | 427       | 358        |
|              | Unwtd Base | 812            | 270      | 267       | 275        |
| Yes          | %          | 59             | 51       | 63        | 54         |
| No           | %          | 41             | 49       | 37        | 46         |
| I don't know | %          |                |          |           |            |

**56. Who (from your household) is most involved in decisions and discussions about domestic water supply within the community and government?**

|       |          | Basin location |          |           |            |
|-------|----------|----------------|----------|-----------|------------|
|       |          | Overall        | Upstream | Midstream | Downstream |
| Total | Wtd Base | 812            | 27       | 427       | 358        |

|                           |            |     |     |     |     |
|---------------------------|------------|-----|-----|-----|-----|
|                           | Unwtd Base | 812 | 270 | 267 | 275 |
| Male household head       | %          | 17  | 18  | 16  | 19  |
| No one                    | %          | 54  | 50  | 56  | 53  |
| I don't know              | %          | 1   | 1   | 2   | 1   |
| Female household head     | %          | 7   | 7   | 9   | 6   |
| Wife of household head    | %          | 14  | 18  | 13  | 14  |
| Husband of household head | %          | 1   | 1   |     | 1   |
| Other adult male          | %          | 1   | 2   | 1   | 1   |
| Other adult female        | %          | 2   |     | 1   | 3   |
| Elderly male              | %          | 1   | 2   | 1   | 1   |
| Elderly female            | %          | 1   | 1   | 1   | 1   |
| Male child                | %          |     |     |     | 0   |

**57. Do you feel your voice/ your household member's is heard?**

|              |            | Basin location |          |           |            |
|--------------|------------|----------------|----------|-----------|------------|
|              |            | Overall        | Upstream | Midstream | Downstream |
| Total        | Wtd Base   | 310            | 12       | 160       | 138        |
|              | Unwtd Base | 324            | 118      | 100       | 106        |
| Yes          | %          | 44             | 55       | 46        | 42         |
| No           | %          | 14             | 19       | 11        | 16         |
| I don't know | %          | 42             | 26       | 43        | 42         |

**58. Who is most involved in decisions about domestic water supply within the home?**

|                           |            | Basin location |          |           |            |
|---------------------------|------------|----------------|----------|-----------|------------|
|                           |            | Overall        | Upstream | Midstream | Downstream |
| Total                     | Wtd Base   | 812            | 27       | 427       | 358        |
|                           | Unwtd Base | 812            | 270      | 267       | 275        |
| Male household head       | %          | 39             | 41       | 40        | 39         |
| No one                    | %          | 3              | 5        | 4         | 2          |
| I don't know              | %          |                |          |           | 0          |
| Female household head     | %          | 10             | 7        | 11        | 10         |
| Wife of household head    | %          | 29             | 36       | 28        | 30         |
| Husband of household head | %          | 4              | 3        | 4         | 4          |
| Other adult male          | %          | 6              | 4        | 7         | 6          |
| Other adult female        | %          | 6              | 3        | 5         | 7          |
| Elderly male              | %          |                | 1        |           |            |
| Elderly female            | %          | 1              | 1        | 1         | 1          |
| Male child                | %          |                | 0        | 0         |            |

**59. Does your household grow crops and/or raise livestock?**

|  | Basin location |
|--|----------------|
|--|----------------|

|           |            | Overall | Upstream | Midstream | Downstream |
|-----------|------------|---------|----------|-----------|------------|
| Total     | Wtd Base   | 812     | 27       | 427       | 358        |
|           | Unwtd Base | 812     | 270      | 267       | 275        |
| crops     | %          | 30      | 20       | 33        | 27         |
| livestock | %          | 5       | 3        | 6         | 4          |
| Both      | %          | 59      | 71       | 59        | 59         |
| Neither   | %          | 7       | 6        | 3         | 11         |

**60. Are your crops for income or food supply?**

**Income**

**60. Are your crops for income or food supply?**

**Income**

**60. Are your crops for income or food supply?**

**Income**

|             |            | Basin location |          |           |            |
|-------------|------------|----------------|----------|-----------|------------|
|             |            | Overall        | Upstream | Midstream | Downstream |
| Total       | Wtd Base   | 720            | 24       | 390       | 305        |
|             | Unwtd Base | 726            | 248      | 244       | 234        |
| Income      | %          | 8              | 26       | 10        | 3          |
| Food supply | %          | 33             | 14       | 29        | 38         |
| Both        | %          | 60             | 60       | 61        | 58         |

**61. Who is in charge of selling the crops?**

|                           |            | Basin location |          |           |            |
|---------------------------|------------|----------------|----------|-----------|------------|
|                           |            | Overall        | Upstream | Midstream | Downstream |
| Total                     | Wtd Base   | 485            | 21       | 277       | 188        |
|                           | Unwtd Base | 530            | 213      | 173       | 144        |
| Male household head       | %          | 35             | 44       | 34        | 37         |
| Female child              | %          | 1              | 1        |           | 1          |
| I don't know              | %          |                | 1        | 0         | 0          |
| Female household head     | %          | 9              | 6        | 10        | 8          |
| Wife of household head    | %          | 33             | 38       | 30        | 38         |
| Husband of household head | %          | 4              | 2        | 4         | 4          |
| Other adult male          | %          | 9              | 3        | 10        | 7          |
| Other adult female        | %          | 7              | 1        | 9         | 5          |
| Elderly male              | %          |                | 1        |           |            |
| Elderly female            | %          | 1              | 1        | 1         |            |
| Male child                | %          | 1              | 1        | 1         | 0          |

**62. Who makes decisions about how to spend the money coming from selling the crops?**

|  |  | Basin location |          |           |            |
|--|--|----------------|----------|-----------|------------|
|  |  | Overall        | Upstream | Midstream | Downstream |

|                           |            |     |     |     |     |
|---------------------------|------------|-----|-----|-----|-----|
| Total                     | Wtd Base   | 485 | 21  | 277 | 188 |
|                           | Unwtd Base | 530 | 213 | 173 | 144 |
| Male household head       | %          | 26  | 31  | 22  | 31  |
| Female child              | %          |     |     | 0   |     |
| I don't know              | %          |     | 1   | 0   | 0   |
| Female household head     | %          | 13  | 8   | 16  | 9   |
| Wife of household head    | %          | 48  | 55  | 47  | 48  |
| Husband of household head | %          | 3   | 1   | 3   | 4   |
| Other adult male          | %          | 4   | 2   | 4   | 4   |
| Other adult female        | %          | 5   | 2   | 7   | 4   |
| Elderly male              | %          |     |     | 0   | 0   |
| Elderly female            | %          | 1   | 1   | 1   | 1   |
| Male child                | %          |     | 0   | 1   | 0   |

**63. What percentage of the crop production is for food supply?**

|               |            | Basin location |          |           |            |
|---------------|------------|----------------|----------|-----------|------------|
|               |            | Overall        | Upstream | Midstream | Downstream |
| Total         | Wtd Base   | 429            | 15       | 237       | 177        |
|               | Unwtd Base | 432            | 148      | 148       | 136        |
| Less than 50% | %          | 57             | 62       | 54        | 60         |
| More than 50% | %          | 30             | 24       | 33        | 26         |
| Equal (50:50) | %          |                | 12       | 12        | 14         |
| I don't know  | %          |                | 1        | 1         | 0          |

**64. Who participates in growing crops?**

|                           |            | Basin location |          |           |            |
|---------------------------|------------|----------------|----------|-----------|------------|
|                           |            | Overall        | Upstream | Midstream | Downstream |
| Total                     | Wtd Base   | 720            | 24       | 390       | 305        |
|                           | Unwtd Base | 726            | 248      | 244       | 234        |
| Male household head       | %          | 35             | 36       | 34        | 36         |
| Female child              | %          | 1              | 4        | 1         | 1          |
| Other                     | %          |                |          | 0         | 0          |
| Female household head     | %          | 9              | 6        | 10        | 7          |
| Wife of household head    | %          | 27             | 29       | 26        | 27         |
| Husband of household head | %          | 4              | 3        | 4         | 4          |
| Other adult male          | %          | 11             | 7        | 11        | 11         |
| Other adult female        | %          | 8              | 6        | 8         | 8          |
| Elderly male              | %          | 1              | 2        |           | 2          |
| Elderly female            | %          | 2              | 2        | 2         | 2          |
| Male child                | %          | 2              | 5        | 2         | 2          |

**65. Who is most involved in decisions about growing crops?**

|                           |            | Basin location |          |           |            |
|---------------------------|------------|----------------|----------|-----------|------------|
|                           |            | Overall        | Upstream | Midstream | Downstream |
| Total                     | Wtd Base   | 720            | 24       | 390       | 305        |
|                           | Unwtd Base | 726            | 248      | 244       | 234        |
| Male household head       | %          | 41             | 41       | 42        | 40         |
| Female child              | %          |                |          |           |            |
| No one                    | %          |                | 0        | 0         |            |
| Other                     | %          |                |          | 0         | 0          |
| Female household head     | %          | 11             | 8        | 13        | 9          |
| Wife of household head    | %          | 30             | 38       | 28        | 32         |
| Husband of household head | %          | 5              | 3        | 5         | 5          |
| Other adult male          | %          | 6              | 3        | 6         | 6          |
| Other adult female        | %          | 4              | 3        | 4         | 5          |
| Elderly male              | %          | 1              | 1        |           | 1          |
| Elderly female            | %          | 2              | 2        | 1         | 2          |
| Male child                | %          |                |          |           |            |

**66. What do you use your livestock for?**

|                |            | Basin location |          |           |            |
|----------------|------------|----------------|----------|-----------|------------|
|                |            | Overall        | Upstream | Midstream | Downstream |
| Total          | Wtd Base   | 519            | 20       | 275       | 224        |
|                | Unwtd Base | 544            | 200      | 172       | 172        |
| Income         | %          | 37             | 29       | 33        | 42         |
| Food supply    | %          | 60             | 69       | 64        | 54         |
| Transportation | %          |                | 1        | 1         | 0          |
| Farm work      | %          | 3              | 1        | 1         | 4          |
| I don't know   | %          |                | 0        |           | 0          |

**67. Who participates in raising livestock?**

|                           |            | Basin location |          |           |            |
|---------------------------|------------|----------------|----------|-----------|------------|
|                           |            | Overall        | Upstream | Midstream | Downstream |
| Total                     | Wtd Base   | 519            | 20       | 275       | 224        |
|                           | Unwtd Base | 544            | 200      | 172       | 172        |
| Male household head       | %          | 34             | 33       | 34        | 34         |
| Female child              | %          | 3              | 6        | 2         | 3          |
| Female household head     | %          | 7              | 6        | 8         | 7          |
| Wife of household head    | %          | 29             | 32       | 30        | 29         |
| Husband of household head | %          | 4              | 2        | 3         | 4          |
| Other adult male          | %          | 10             | 6        | 11        | 9          |
| Other adult female        | %          | 8              | 7        | 8         | 8          |
| Elderly male              | %          |                | 1        |           |            |

|                |   |   |   |   |   |
|----------------|---|---|---|---|---|
| Elderly female | % | 1 | 2 | 1 | 1 |
| Male child     | % | 4 | 5 | 4 | 5 |

**68. Who is most involved in decisions about raising livestock?**

|                           |          | Basin location |          |           |            |
|---------------------------|----------|----------------|----------|-----------|------------|
|                           |          | Overall        | Upstream | Midstream | Downstream |
| Total                     |          | 519            | 20       | 275       | 224        |
|                           | Wtd Base |                |          |           |            |
|                           | Unwtd    | 544            | 200      | 172       | 172        |
|                           | Base     |                |          |           |            |
| Male household head       | %        | 39             | 41       | 37        | 40         |
| Female child              | %        | 1              | 1        |           | 1          |
| Female household head     | %        | 8              | 7        | 9         | 7          |
| Wife of household head    | %        | 33             | 40       | 33        | 33         |
| Husband of household head | %        | 4              | 3        | 4         | 5          |
| Other adult male          | %        | 8              | 3        | 9         | 7          |
| Other adult female        | %        | 6              | 3        | 6         | 6          |
| Elderly male              | %        |                |          |           | 1          |
| Elderly female            | %        | 1              | 1        |           | 1          |
| Male child                | %        |                | 2        |           |            |

**69. What crops do you grow or livestock do you raise?**

|               |          | Basin location |          |           |            |
|---------------|----------|----------------|----------|-----------|------------|
|               |          | Overall        | Upstream | Midstream | Downstream |
| Total         |          | 759            | 25       | 414       | 319        |
|               | Wtd Base |                |          |           |            |
|               | Unwtd    | 759            | 255      | 259       | 245        |
|               | Base     |                |          |           |            |
| Rice          | %        | 18             | 13       | 14        | 24         |
| Rubber        | %        | 1              | 3        | 1         |            |
| Water buffalo | %        | 1              | 2        | 1         | 1          |
| Cows          | %        | 6              | 3        | 6         | 7          |
| Chickens      | %        | 20             | 21       | 19        | 22         |
| Goats         | %        |                | 0        | 0         |            |
| Others        | %        | 11             | 19       | 13        | 7          |
| Fruit trees   | %        | 19             | 12       | 19        | 20         |
| Vegetables    | %        | 10             | 7        | 10        | 12         |
| Pepper        | %        |                |          |           | 0          |
| Cassava       | %        | 8              | 15       | 11        | 3          |
| Maize         | %        |                | 1        | 1         |            |
| Sugarcane     | %        | 1              | 1        |           | 1          |
| Soybeans      | %        |                |          |           |            |
| Coconuts      | %        | 4              | 3        | 5         | 3          |

**70. How much land does your household use for growing these crops and raising these livestock?**

|  | Basin location |
|--|----------------|
|--|----------------|

|             |            | Overall | Upstream | Midstream | Downstream |
|-------------|------------|---------|----------|-----------|------------|
| Total       | Wtd Base   | 131     | 8        | 88        | 35         |
|             | Unwtd Base | 159     | 77       | 55        | 27         |
| Rice        | %          | 43      | 32       | 34        | 69         |
| Rubber      | %          | 2       | 3        | 3         | 0          |
| Chickens    | %          | 1       | 0        | 2         | 0          |
| Others      | %          | 20      | 24       | 23        | 13         |
| Fruit trees | %          | 4       | 2        | 5         | 3          |
| Vegetables  | %          | 2       | 1        | 0         | 6          |
| Pepper      | %          | 2       | 0        | 3         | 0          |
| Cassava     | %          | 25      | 35       | 31        | 9          |
| Sugarcane   | %          |         | 1        | 0         | 0          |
| Soybeans    | %          |         | 2        | 0         | 0          |

**71. What is the status of the land that you use for growing crops and livestock? Rice**

|                                                                                                             |            | Basin location |          |           |            |
|-------------------------------------------------------------------------------------------------------------|------------|----------------|----------|-----------|------------|
|                                                                                                             |            | Overall        | Upstream | Midstream | Downstream |
| Total                                                                                                       | Wtd Base   | 423            | 11       | 189       | 223        |
|                                                                                                             | Unwtd Base | 403            | 114      | 118       | 171        |
| I/someone in my household owns it                                                                           | %          | 89             | 83       | 94        | 84         |
| I/someone in my household leases it                                                                         | %          | 10             | 2        | 6         | 15         |
| I/someone in my household works for someone doing these activities, but does not have ownership of the land | %          | 1              | 5        | 0         | 1          |
| The land is communally owned and used                                                                       | %          |                | 7        | 0         | 0          |
| Other                                                                                                       | %          |                | 3        | 0         | 0          |

**71. What is the status of the land that you use for growing crops and livestock? Fruit Trees**

|                                                                                                             |            | Basin location |          |           |            |
|-------------------------------------------------------------------------------------------------------------|------------|----------------|----------|-----------|------------|
|                                                                                                             |            | Overall        | Upstream | Midstream | Downstream |
| Total                                                                                                       | Wtd Base   | 449            | 10       | 256       | 182        |
|                                                                                                             | Unwtd Base | 405            | 105      | 160       | 140        |
| I/someone in my household owns it                                                                           | %          | 96             | 97       | 96        | 96         |
| I/someone in my household leases it                                                                         | %          | 2              | 1        | 1         | 2          |
| I/someone in my household works for someone doing these activities, but does not have ownership of the land | %          | 2              | 2        | 2         | 1          |
| Other                                                                                                       | %          | 1              | 0        | 1         | 1          |

**71. What is the status of the land that you use for growing crops and livestock? Vegetables**

|  |  | Basin location |
|--|--|----------------|
|--|--|----------------|

|                                                                                                             |            | Overall | Upstream | Midstream | Downstream |
|-------------------------------------------------------------------------------------------------------------|------------|---------|----------|-----------|------------|
| Total                                                                                                       | Wtd Base   | 246     | 6        | 133       | 107        |
|                                                                                                             | Unwtd Base | 229     | 64       | 83        | 82         |
| I/someone in my household owns it                                                                           | %          | 95      | 91       | 94        | 96         |
| I/someone in my household leases it                                                                         | %          | 1       | 2        | 0         | 2          |
| I/someone in my household works for someone doing these activities, but does not have ownership of the land | %          | 3       | 2        | 4         | 1          |
| The land is communally owned and used                                                                       | %          | 1       | 5        | 1         | 0          |
| Other                                                                                                       | %          | 1       | 2        | 1         | 0          |

**71. What is the status of the land that you use for growing crops and livestock? Pepper**

|                                   |            | Basin location |          |           | Gender |
|-----------------------------------|------------|----------------|----------|-----------|--------|
|                                   |            | Overall        | Upstream | Midstream | Male   |
| Total                             | Wtd Base   | 6              |          | 6         | 3      |
|                                   | Unwtd Base | 5              | 1        | 4         | 2      |
| I/someone in my household owns it | %          | 100            | 100      | 100       | 100    |

**71. What is the status of the land that you use for growing crops and livestock? Cassava**

|                                                                                                             |            | Basin location |          |           |            |
|-------------------------------------------------------------------------------------------------------------|------------|----------------|----------|-----------|------------|
|                                                                                                             |            | Overall        | Upstream | Midstream | Downstream |
| Total                                                                                                       | Wtd Base   | 191            | 13       | 149       | 29         |
|                                                                                                             | Unwtd Base | 248            | 133      | 93        | 22         |
| I/someone in my household owns it                                                                           | %          | 88             | 86       | 87        | 91         |
| I/someone in my household leases it                                                                         | %          | 12             | 6        | 13        | 9          |
| I/someone in my household works for someone doing these activities, but does not have ownership of the land | %          |                | 1        | 0         | 0          |
| The land is communally owned and used                                                                       | %          |                | 6        | 0         | 0          |
| Other                                                                                                       | %          |                | 1        | 0         | 0          |

**71. What is the status of the land that you use for growing crops and livestock? Maize**

|                                       |            | Basin location |          |           |            |
|---------------------------------------|------------|----------------|----------|-----------|------------|
|                                       |            | Overall        | Upstream | Midstream | Downstream |
| Total                                 | Wtd Base   | 12             | 1        | 8         | 3          |
|                                       | Unwtd Base | 18             | 11       | 5         | 2          |
| I/someone in my household owns it     | %          | 99             | 91       | 100       | 100        |
| The land is communally owned and used | %          | 1              | 9        | 0         | 0          |

**71. What is the status of the land that you use for growing crops and livestock? Sugarcane**

|                                                                                                             |            | Basin location |          |           |            |
|-------------------------------------------------------------------------------------------------------------|------------|----------------|----------|-----------|------------|
|                                                                                                             |            | Overall        | Upstream | Midstream | Downstream |
| Total                                                                                                       | Wtd Base   | 12             | 1        | 5         | 7          |
|                                                                                                             | Unwtd Base | 15             | 7        | 3         | 5          |
| I/someone in my household owns it                                                                           | %          | 88             | 86       | 100       | 80         |
| I/someone in my household works for someone doing these activities, but does not have ownership of the land | %          | 11             | 0        | 0         | 20         |
| The land is communally owned and used                                                                       | %          | 1              | 14       | 0         | 0          |

**71. What is the status of the land that you use for growing crops and livestock? Soybeans**

|                                     |            | Basin location |          |           |            |
|-------------------------------------|------------|----------------|----------|-----------|------------|
|                                     |            | Overall        | Upstream | Midstream | Downstream |
| Total                               | Wtd Base   | 6              |          | 2         | 4          |
|                                     | Unwtd Base | 6              | 2        | 1         | 3          |
| I/someone in my household owns it   | %          | 81             | 100      | 100       | 75         |
| I/someone in my household leases it | %          | 19             | 0        | 0         | 25         |

**71. What is the status of the land that you use for growing crops and livestock? Coconuts**

|                                                                                                             |            | Basin location |          |           |            |
|-------------------------------------------------------------------------------------------------------------|------------|----------------|----------|-----------|------------|
|                                                                                                             |            | Overall        | Upstream | Midstream | Downstream |
| Total                                                                                                       | Wtd Base   | 90             | 3        | 61        | 26         |
|                                                                                                             | Unwtd Base | 85             | 27       | 38        | 20         |
| I/someone in my household owns it                                                                           | %          | 97             | 96       | 97        | 95         |
| I/someone in my household works for someone doing these activities, but does not have ownership of the land | %          | 2              | 4        | 3         | 0          |
| The land is communally owned and used                                                                       | %          | 1              | 0        | 0         | 5          |

**71. What is the status of the land that you use for growing crops and livestock? Rubber**

|                                     |            | Basin location |          |           |            |
|-------------------------------------|------------|----------------|----------|-----------|------------|
|                                     |            | Overall        | Upstream | Midstream | Downstream |
| Total                               | Wtd Base   | 18             | 2        | 13        | 3          |
|                                     | Unwtd Base | 34             | 24       | 8         | 2          |
| I/someone in my household owns it   | %          | 97             | 75       | 100       | 100        |
| I/someone in my household leases it | %          | 1              | 4        | 0         | 0          |

|                                                                                                             |   |   |    |   |   |
|-------------------------------------------------------------------------------------------------------------|---|---|----|---|---|
| I/someone in my household works for someone doing these activities, but does not have ownership of the land | % | 1 | 4  | 0 | 0 |
| The land is communally owned and used                                                                       | % | 2 | 17 | 0 | 0 |

**71. What is the status of the land that you use for growing crops and livestock? Water Buffalo**

|                                   |            | Basin location |          |           |            |
|-----------------------------------|------------|----------------|----------|-----------|------------|
|                                   |            | Overall        | Upstream | Midstream | Downstream |
| Total                             |            |                |          |           |            |
|                                   | Wtd Base   | 16             | 2        | 10        | 5          |
|                                   | Unwtd Base | 26             | 16       | 6         | 4          |
| I/someone in my household owns it | %          | 99             | 88       | 100       | 100        |
| I don't know                      | %          | 1              | 6        | 0         | 0          |
| Other                             | %          | 1              | 6        | 0         | 0          |

**71. What is the status of the land that you use for growing crops and livestock? Cows**

|                                                                                                             |            | Basin location |          |           |            |
|-------------------------------------------------------------------------------------------------------------|------------|----------------|----------|-----------|------------|
|                                                                                                             |            | Overall        | Upstream | Midstream | Downstream |
| Total                                                                                                       |            |                |          |           |            |
|                                                                                                             | Wtd Base   | 149            | 3        | 77        | 69         |
|                                                                                                             | Unwtd Base | 130            | 29       | 48        | 53         |
| I/someone in my household owns it                                                                           | %          | 97             | 100      | 98        | 96         |
| I/someone in my household leases it                                                                         | %          | 1              | 0        | 0         | 2          |
| I/someone in my household works for someone doing these activities, but does not have ownership of the land | %          | 1              | 0        | 2         | 0          |
| Other                                                                                                       | %          | 1              | 0        | 0         | 2          |

**71. What is the status of the land that you use for growing crops and livestock? Chickens**

|                                                                                                             |            | Basin location |          |           |            |
|-------------------------------------------------------------------------------------------------------------|------------|----------------|----------|-----------|------------|
|                                                                                                             |            | Overall        | Upstream | Midstream | Downstream |
| Total                                                                                                       |            |                |          |           |            |
|                                                                                                             | Wtd Base   | 469            | 18       | 250       | 201        |
|                                                                                                             | Unwtd Base | 496            | 186      | 156       | 154        |
| I/someone in my household owns it                                                                           | %          | 99             | 97       | 98        | 99         |
| I/someone in my household works for someone doing these activities, but does not have ownership of the land | %          | 1              | 1        | 1         | 0          |
| The land is communally owned and used                                                                       | %          |                | 1        | 0         | 0          |
| Other                                                                                                       | %          | 1              | 1        | 1         | 1          |

**71. What is the status of the land that you use for growing crops and livestock? Goats**

|  | Basin location | Gender |
|--|----------------|--------|
|--|----------------|--------|

|                                   |            | Overall | Downstream | Male | Female |
|-----------------------------------|------------|---------|------------|------|--------|
| Total                             | Wtd Base   | 1       | 1          | 1    | 0      |
|                                   | Unwtd Base | 1       | 1          | 1    | 0      |
| I/someone in my household owns it | %          | 100     | 100        | 100  | 0      |

**71. What is the status of the land that you use for growing crops and livestock? Others**

|                                                                                                             |            | Basin location |          |           |            |
|-------------------------------------------------------------------------------------------------------------|------------|----------------|----------|-----------|------------|
|                                                                                                             |            | Overall        | Upstream | Midstream | Downstream |
| Total                                                                                                       | Wtd Base   | 260            | 17       | 174       | 69         |
|                                                                                                             | Unwtd Base | 335            | 173      | 109       | 53         |
| I/someone in my household owns it                                                                           | %          | 96             | 93       | 100       | 87         |
| I/someone in my household leases it                                                                         | %          | 3              | 1        | 0         | 9          |
| I/someone in my household works for someone doing these activities, but does not have ownership of the land | %          |                | 1        | 0         | 0          |
| The land is communally owned and used                                                                       | %          | 1              | 6        | 0         | 2          |
| Other                                                                                                       | %          |                | 0        | 0         | 2          |

**74. If you grow rice, how many times do you plant per year?**

\_\_\_\_\_ times

**74. If you grow rice, how many times do you plant per year?**

\_\_\_\_\_ times

**74. If you grow rice, how many times do you plant per year?**

\_\_\_\_\_ times

**74. If you grow rice, how many times do you plant per year?**

|       |            | Basin location |          |           |            |
|-------|------------|----------------|----------|-----------|------------|
|       |            | Overall        | Upstream | Midstream | Downstream |
| Total | Wtd Base   | 423            | 11       | 189       | 223        |
|       | Unwtd Base | 403            | 114      | 118       | 171        |
| 1     | %          | 67             | 86       | 97        | 42         |
| 2     | %          | 31             | 12       | 3         | 56         |
| 3     | %          | 1              | 2        | 0         | 2          |

**75. Has this increased in the past ten years?**

|       |            | Basin location |          |           |            |
|-------|------------|----------------|----------|-----------|------------|
|       |            | Overall        | Upstream | Midstream | Downstream |
| Total | Wtd Base   | 423            | 11       | 189       | 223        |
|       | Unwtd Base | 403            | 114      | 118       | 171        |
| Yes   | %          | 19             | 16       | 6         | 30         |

|    |   |    |    |    |    |
|----|---|----|----|----|----|
| No | % | 81 | 84 | 94 | 70 |
|----|---|----|----|----|----|

**76. Have you increased or decreased the area of land you use for growing crops or raising livestock in the past 5 years?**

|                            |            | Basin location |          |           |            |
|----------------------------|------------|----------------|----------|-----------|------------|
|                            |            | Overall        | Upstream | Midstream | Downstream |
| Total                      | Wtd Base   | 759            | 25       | 414       | 319        |
|                            | Unwtd Base | 759            | 255      | 259       | 245        |
| Increase in cropped area   | %          | 17             | 26       | 18        | 15         |
| Increase in livestock area | %          | 1              | 2        | 2         |            |
| Increase in both           | %          | 1              |          | 1         | 2          |
| Not at all                 | %          | 69             | 63       | 67        | 72         |
| Decrease in cropped area   | %          | 9              | 7        | 8         | 9          |
| Decrease in livestock area | %          | 1              | 1        | 2         | 1          |
| Decrease in both           | %          | 1              | 1        |           | 1          |
| I don't know               | %          |                | 0        | 1         | 0          |

**77. What sources of water do you use for your animals?**

|             |            | Basin location |          |           |            |
|-------------|------------|----------------|----------|-----------|------------|
|             |            | Overall        | Upstream | Midstream | Downstream |
| Total       | Wtd Base   | 519            | 20       | 275       | 224        |
|             | Unwtd Base | 544            | 200      | 172       | 172        |
| Piped water | %          | 8              |          | 5         | 13         |
| Other       | %          | 12             | 13       | 6         | 19         |
| Rainwater   | %          | 4              | 1        | 2         | 7          |
| Tanks       | %          |                | 0        | 0         | 1          |
| Dams        | %          | 1              | 0        | 3         | 0          |
| Ponds       | %          | 4              | 3        | 2         | 6          |
| Wells       | %          | 65             | 81       | 81        | 44         |
| Rivers      | %          | 4              | 0        | 0         | 9          |
| Lakes       | %          | 1              | 1        | 1         | 2          |

**78. Have you had enough water for your animals in the past 12 months?**

|       |            | Basin location |          |           |            |
|-------|------------|----------------|----------|-----------|------------|
|       |            | Overall        | Upstream | Midstream | Downstream |
| Total | Wtd Base   | 519            | 20       | 275       | 224        |
|       | Unwtd Base | 544            | 200      | 172       | 172        |
| Yes   | %          | 96             | 84       | 97        | 95         |
| No    | %          | 4              | 16       | 3         | 5          |

**79. In the past 12 months, during which months did you not have enough water for your animals?**

|        |            | Basin location |          |           |            |
|--------|------------|----------------|----------|-----------|------------|
|        |            | Overall        | Upstream | Midstream | Downstream |
| Total  | Wtd Base   | 23             | 3        | 10        | 10         |
|        | Unwtd Base | 45             | 31       | 6         | 8          |
| Oct-18 | %          |                | 1        | 0         | 0          |
| Jul-19 | %          |                | 2        | 0         | 0          |
| Aug-19 | %          |                | 1        | 0         | 0          |
| Nov-18 | %          |                | 2        | 0         | 0          |
| Dec-18 | %          |                | 2        | 0         | 0          |
| Jan-19 | %          | 3              | 6        | 0         | 6          |
| Feb-19 | %          | 12             | 8        | 19        | 6          |
| Mar-19 | %          | 34             | 22       | 38        | 35         |
| Apr-19 | %          | 35             | 31       | 31        | 41         |
| May-19 | %          | 13             | 15       | 13        | 12         |
| Jun-19 | %          | 1              | 8        | 0         | 0          |

**80. Are you able to grow enough crops for your needs?**

|                        |            | Basin location |          |           |            |
|------------------------|------------|----------------|----------|-----------|------------|
|                        |            | Overall        | Upstream | Midstream | Downstream |
| Total                  | Wtd Base   | 720            | 24       | 390       | 305        |
|                        | Unwtd Base | 726            | 248      | 244       | 234        |
| Enough for food        | %          | 41             | 26       | 37        | 47         |
| Enough for selling     | %          | 20             | 17       | 22        | 18         |
| Not enough for food    | %          | 16             | 21       | 18        | 13         |
| Not enough for selling | %          | 23             | 35       | 23        | 22         |
| I don't know           | %          |                | 1        | 0         | 0          |

**80. Are you able to raise enough livestock for your needs?**

|                        |            | Basin location |          |           |            |
|------------------------|------------|----------------|----------|-----------|------------|
|                        |            | Overall        | Upstream | Midstream | Downstream |
| Total                  | Wtd Base   | 519            | 20       | 275       | 224        |
|                        | Unwtd Base | 544            | 200      | 172       | 172        |
| Enough for food        | %          | 32             | 32       | 29        | 35         |
| Enough for selling     | %          | 14             | 7        | 14        | 15         |
| Not enough for food    | %          | 30             | 32       | 38        | 22         |
| Not enough for selling | %          | 23             | 29       | 19        | 28         |

|              |   |  |  |  |   |
|--------------|---|--|--|--|---|
| I don't know | % |  |  |  | 0 |
|--------------|---|--|--|--|---|

**81. What are the main problems your household experiences in agriculture?**

|                                                     |            | Basin location |          |           |            |
|-----------------------------------------------------|------------|----------------|----------|-----------|------------|
|                                                     |            | Overall        | Upstream | Midstream | Downstream |
| Total                                               | Wtd Base   | 759            | 25       | 414       | 319        |
|                                                     | Unwtd Base | 759            | 255      | 259       | 245        |
| Insufficient water for irrigation in the wet season | %          | 7              | 3        | 6         | 8          |
| Loss of agricultural lands                          | %          | 1              | 0        | 1         |            |
| Lack of labor workers                               | %          | 1              | 3        | 1         | 2          |
| Difficulty accessing credits                        | %          |                | 1        |           | 1          |
| Water pollution                                     | %          |                | 0        | 0         |            |
| Soil pollution                                      | %          | 1              |          | 1         | 1          |
| Land concessions are taking land                    | %          |                |          | 0         | 0          |
| Don't make enough money                             | %          | 1              | 3        | 1         | 2          |
| Poor soil quality                                   | %          | 2              | 2        | 2         | 2          |
| Unreliable yields                                   | %          | 6              | 6        | 6         | 6          |
| Consistently low yields                             | %          | 1              | 2        | 2         | 1          |
| Insufficient water for irrigation in the dry season | %          | 7              | 4        | 3         | 12         |
| High cost of inputs (seeds, fertilizers, etc)       | %          | 8              | 12       | 8         | 9          |
| Labor is too expensive                              | %          | 3              | 5        | 3         | 3          |
| I don't know                                        | %          | 3              | 3        | 3         | 3          |
| Other                                               | %          | 20             | 13       | 25        | 15         |
| Floods                                              | %          | 5              | 2        | 5         | 5          |
| Droughts                                            | %          | 17             | 19       | 16        | 17         |
| Lack of markets                                     | %          | 4              | 2        | 5         | 3          |
| High transportation costs                           | %          |                | 1        | 0         |            |
| Poor roads to markets                               | %          | 1              | 1        | 1         |            |
| No transportation is available                      | %          |                |          | 0         |            |
| Declining productivity                              | %          | 12             | 17       | 13        | 12         |

**82. Do you see any negative impacts of farming on the environment?**

|              |            | Basin location |          |           |            |
|--------------|------------|----------------|----------|-----------|------------|
|              |            | Overall        | Upstream | Midstream | Downstream |
| Total        | Wtd Base   | 759            | 25       | 414       | 319        |
|              | Unwtd Base | 759            | 255      | 259       | 245        |
| Yes          | %          | 28             | 36       | 20        | 37         |
| No           | %          | 61             | 45       | 68        | 55         |
| I don't know | %          | 11             | 19       | 12        | 9          |

**83. What are these impacts?**

|                                                       |            | Basin location |          |           |            |
|-------------------------------------------------------|------------|----------------|----------|-----------|------------|
|                                                       |            | Overall        | Upstream | Midstream | Downstream |
| Total                                                 | Wtd Base   | 211            | 9        | 85        | 117        |
|                                                       | Unwtd Base | 234            | 91       | 53        | 90         |
| Habitat loss for Floricans                            | %          | 2              | 2        | 1         | 2          |
| I don't know                                          | %          | 1              | 4        | 0         | 1          |
| Poor water quality in rivers                          | %          | 8              | 8        | 3         | 11         |
| Lower flows in rivers during the dry season           | %          | 2              | 0        | 2         | 3          |
| Human health issues related to poor water quality     | %          | 40             | 45       | 44        | 38         |
| Livestock health issues related to poor water quality | %          | 20             | 21       | 19        | 21         |
| Wildlife health issues related to poor water quality  | %          | 8              | 13       | 11        | 6          |
| Soil degradation                                      | %          | 5              | 3        | 6         | 5          |
| Decreasing fish populations                           | %          | 10             | 4        | 5         | 13         |
| Other                                                 | %          | 4              | 1        | 8         | 2          |

#### 84. Do you use chemical fertilizers?

|       |            | Basin location |          |           |            |
|-------|------------|----------------|----------|-----------|------------|
|       |            | Overall        | Upstream | Midstream | Downstream |
| Total | Wtd Base   | 720            | 24       | 390       | 305        |
|       | Unwtd Base | 726            | 248      | 244       | 234        |
| Yes   | %          | 61             | 49       | 54        | 72         |
| No    | %          | 39             | 51       | 46        | 28         |

#### 85. Do you use chemical herbicides?

|       |            | Basin location |          |           |            |
|-------|------------|----------------|----------|-----------|------------|
|       |            | Overall        | Upstream | Midstream | Downstream |
| Total | Wtd Base   | 720            | 24       | 390       | 305        |
|       | Unwtd Base | 726            | 248      | 244       | 234        |
| Yes   | %          | 68             | 82       | 63        | 74         |
| No    | %          | 32             | 18       | 37        | 26         |

#### 86. Do you use chemical pesticides?

|       |            | Basin location |          |           |            |
|-------|------------|----------------|----------|-----------|------------|
|       |            | Overall        | Upstream | Midstream | Downstream |
| Total | Wtd Base   | 720            | 24       | 390       | 305        |
|       | Unwtd Base | 726            | 248      | 244       | 234        |
| Yes   | %          | 51             | 58       | 43        | 61         |

|    |   |    |    |    |    |
|----|---|----|----|----|----|
| No | % | 49 | 42 | 57 | 39 |
|----|---|----|----|----|----|

**87. Is your chemical agriculture input use increasing compared to the last crop?**

|              |          | Basin location |          |           |                |
|--------------|----------|----------------|----------|-----------|----------------|
|              |          | Overall        | Upstream | Midstream | Downstre<br>am |
| Total        | Wtd Base | 527            | 21       | 270       | 236            |
|              | Unwtd    | 563            | 213      | 169       | 181            |
|              | Base     |                |          |           |                |
| Yes          | %        | 53             | 61       | 53        | 52             |
| No           | %        | 45             | 35       | 46        | 45             |
| I don't know | %        | 2              | 4        | 1         | 3              |

**88. Why is your chemical agriculture input use increasing compared to the last crop?**

|                                            |          | Basin location |          |           |                |
|--------------------------------------------|----------|----------------|----------|-----------|----------------|
|                                            |          | Overall        | Upstream | Midstream | Downstre<br>am |
| Total                                      | Wtd Base | 278            | 13       | 142       | 122            |
|                                            | Unwtd    | 313            | 130      | 89        | 94             |
|                                            | Base     |                |          |           |                |
| To improve soil quality                    | %        | 20             | 9        | 18        | 23             |
| To improve yield                           | %        | 46             | 53       | 45        | 48             |
| They are safe for the environment          | %        | 2              | 0        | 2         | 2              |
| They are safe to eat on the crop           | %        | 4              | 0        | 4         | 5              |
| I cannot afford the risk of losing my crop | %        | 21             | 10       | 25        | 16             |
| Other reasons                              | %        | 7              | 28       | 6         | 7              |

**89. Why is your chemical agriculture input use not increasing compared to the last crop?**

|                                               |          | Basin location |          |           |                |
|-----------------------------------------------|----------|----------------|----------|-----------|----------------|
|                                               |          | Overall        | Upstream | Midstream | Downstre<br>am |
| Total                                         | Wtd Base | 239            | 7        | 125       | 107            |
|                                               | Unwtd    | 235            | 75       | 78        | 82             |
|                                               | Base     |                |          |           |                |
| They damage the environment and wildlife      | %        | 7              | 5        | 4         | 9              |
| They are harmful to the floricans             | %        | 1              | 0        | 0         | 2              |
| They contaminate waterways                    | %        | 3              | 5        | 2         | 4              |
| Use compost and/or natural herbicides instead | %        | 17             | 4        | 16        | 18             |
| They make the crop unsafe to eat              | %        | 30             | 19       | 33        | 27             |
| Don't need them                               | %        | 20             | 32       | 24        | 15             |
| I don't know                                  | %        | 3              | 5        | 4         | 2              |
| Other reasons                                 | %        | 20             | 31       | 17        | 24             |

**90. Are your household's crops irrigated?**

|              |            | Basin location |          |           |            |
|--------------|------------|----------------|----------|-----------|------------|
|              |            | Overall        | Upstream | Midstream | Downstream |
| Total        | Wtd Base   | 812            | 27       | 427       | 358        |
|              | Unwtd Base | 812            | 270      | 267       | 275        |
| Yes          | %          | 50             | 30       | 40        | 62         |
| No           | %          | 47             | 66       | 58        | 33         |
| I don't know | %          | 3              | 4        | 1         | 5          |

**91. Why are you household's crop not irrigated?**

|                                         |            | Basin location |          |           |            |
|-----------------------------------------|------------|----------------|----------|-----------|------------|
|                                         |            | Overall        | Upstream | Midstream | Downstream |
| Total                                   | Wtd Base   | 384            | 18       | 248       | 119        |
|                                         | Unwtd Base | 425            | 179      | 155       | 91         |
| Rain-fed crops                          | %          | 48             | 47       | 48        | 48         |
| I don't know                            | %          | 7              | 1        | 4         | 14         |
| Other                                   | %          | 8              | 4        | 9         | 9          |
| Don't have access to water              | %          | 11             | 15       | 11        | 9          |
| Can't afford to pump water onto my land | %          | 1              | 4        |           | 0          |
| My land's elevation is too high         | %          | 3              | 6        | 3         | 2          |
| My land is too far from the canal       | %          | 8              | 8        | 8         | 7          |
| No tertiary canal near my land          | %          | 2              | 1        | 1         | 4          |
| My land is too far from the river       | %          | 2              | 9        | 3         | 0          |
| I have enough water without irrigating  | %          | 11             | 5        | 13        | 7          |

**92. Would you like to irrigate?**

|              |            | Basin location |          |           |            |
|--------------|------------|----------------|----------|-----------|------------|
|              |            | Overall        | Upstream | Midstream | Downstream |
| Total        | Wtd Base   | 384            | 18       | 248       | 119        |
|              | Unwtd Base | 425            | 179      | 155       | 91         |
| Yes          | %          | 35             | 53       | 37        | 29         |
| No           | %          | 63             | 45       | 62        | 69         |
| I don't know | %          | 2              | 3        | 1         | 2          |

**93. What is your primary source of irrigation water in the current wet season?**

|       |          | Basin location |          |           |            |
|-------|----------|----------------|----------|-----------|------------|
|       |          | Overall        | Upstream | Midstream | Downstream |
| Total | Wtd Base | 402            | 8        | 173       | 221        |

|                                    |            |     |    |     |     |
|------------------------------------|------------|-----|----|-----|-----|
|                                    | Unwtd Base | 358 | 80 | 108 | 170 |
| Rainfall I stored                  | %          | 2   | 7  | 4   | 1   |
| Streams                            | %          | 8   | 11 | 7   | 8   |
| Lakes/reservoir/pond               | %          | 11  | 4  | 13  | 10  |
| I don't irrigate in the wet season | %          | 30  | 42 | 28  | 31  |
| I don't know                       | %          |     | 0  | 1   | 0   |
| Other                              | %          | 3   | 2  | 3   | 3   |
| Tanks                              | %          |     | 0  | 0   | 1   |
| Irrigation canals                  | %          | 14  | 14 | 1   | 24  |
| Dams                               | %          | 3   | 0  | 7   | 1   |
| Groundwater from borehole          | %          | 8   | 1  | 8   | 9   |
| Groundwater from dug well          | %          | 15  | 19 | 25  | 7   |
| Tap/piped water system             | %          | 3   | 0  | 4   | 2   |
| Water pours                        | %          | 1   | 0  | 0   | 2   |
| Rivers                             | %          | 1   | 0  | 0   | 3   |

**94. What was your PRIMARY source of irrigation water in the last dry season?**

|                                    |            | Basin location |          |           |            |
|------------------------------------|------------|----------------|----------|-----------|------------|
|                                    |            | Overall        | Upstream | Midstream | Downstream |
| Total                              | Wtd Base   | 402            | 8        | 173       | 221        |
|                                    | Unwtd Base | 358            | 80       | 108       | 170        |
| Rainfall I stored                  | %          |                | 2        | 0         | 1          |
| Streams                            | %          | 5              | 15       | 6         | 5          |
| Lakes/reservoir/pond               | %          | 13             | 5        | 10        | 16         |
| I don't irrigate in the wet season | %          | 11             | 13       | 7         | 13         |
| I don't know                       | %          | 1              | 0        | 0         | 1          |
| Other                              | %          | 4              | 4        | 6         | 3          |
| Tanks                              | %          |                | 0        | 0         | 1          |
| Irrigation canals                  | %          | 16             | 18       | 3         | 25         |
| Dams                               | %          | 3              | 0        | 5         | 2          |
| Groundwater from borehole          | %          | 16             | 10       | 24        | 11         |
| Groundwater from dug well          | %          | 21             | 33       | 35        | 11         |
| Tap/piped water system             | %          | 3              | 0        | 4         | 2          |
| Water pours                        | %          | 1              | 0        | 0         | 2          |
| Rivers                             | %          | 5              | 0        | 0         | 9          |

**95. Which crops do you irrigate?**

|        |            | Basin location |          |           |            |
|--------|------------|----------------|----------|-----------|------------|
|        |            | Overall        | Upstream | Midstream | Downstream |
| Total  | Wtd Base   | 402            | 8        | 173       | 221        |
|        | Unwtd Base | 358            | 80       | 108       | 170        |
| Rice   | %          | 38             | 27       | 22        | 50         |
| Rubber | %          |                | 3        | 0         | 0          |

|             |   |    |    |    |    |
|-------------|---|----|----|----|----|
| Others      | % | 3  | 10 | 1  | 4  |
| Fruit trees | % | 28 | 19 | 34 | 23 |
| Vegetables  | % | 25 | 31 | 34 | 18 |
| Pepper      | % | 1  | 1  | 3  | 0  |
| Cassava     | % | 1  | 4  | 1  | 1  |
| Maize       | % | 1  | 1  | 1  | 1  |
| Sugarcane   | % | 1  | 0  | 0  | 2  |
| Soybeans    | % |    | 0  | 0  |    |
| Coconuts    | % | 3  | 4  | 5  | 2  |

**97. How many plantings of rice per year do you irrigate?**

|       |            | Basin location |          |           |            |
|-------|------------|----------------|----------|-----------|------------|
|       |            | Overall        | Upstream | Midstream | Downstream |
| Total |            | 216            | 3        | 53        | 160        |
|       | Wtd Base   |                |          |           |            |
|       | Unwtd Base | 187            | 31       | 33        | 123        |
| 1     | %          | 66             | 74       | 94        | 56         |
| 2     | %          | 33             | 23       | 6         | 42         |
| 3     | %          | 1              | 3        | 0         | 1          |
| DK/CS | %          | 1              | 0        | 0         | 1          |

**98. Would you like to irrigate more rice plantings per year than you already do?**

|       |            | Basin location |          |           |            |
|-------|------------|----------------|----------|-----------|------------|
|       |            | Overall        | Upstream | Midstream | Downstream |
| Total |            | 216            | 3        | 53        | 160        |
|       | Wtd Base   |                |          |           |            |
|       | Unwtd Base | 187            | 31       | 33        | 123        |
| Yes   | %          | 68             | 52       | 61        | 71         |
| No    | %          | 32             | 48       | 39        | 29         |

**99. Why don't you irrigate more?**

|                                                          |            | Basin location |          |           |            |
|----------------------------------------------------------|------------|----------------|----------|-----------|------------|
|                                                          |            | Overall        | Upstream | Midstream | Downstream |
| Total                                                    |            | 147            | 2        | 32        | 113        |
|                                                          | Wtd Base   |                |          |           |            |
|                                                          | Unwtd Base | 123            | 16       | 20        | 87         |
| Not enough water is available                            | %          | 63             | 46       | 74        | 60         |
| Water doesn't reach my farm in the dry season            | %          | 14             | 12       | 9         | 16         |
| I can't afford the water/FWUC fees                       | %          | 1              | 15       | 0         | 1          |
| I can't afford to pump the water onto my land more often | %          | 13             | 23       | 9         | 14         |
| Don't need it                                            | %          | 5              | 0        | 9         | 4          |
| I don't know                                             | %          | 1              | 0        | 0         | 2          |

|       |   |   |   |   |   |
|-------|---|---|---|---|---|
| Other | % | 3 | 4 | 0 | 3 |
|-------|---|---|---|---|---|

**103. Did you have enough water for irrigating your crops over the last 12 months?**

|              |            | Basin location |          |           |            |
|--------------|------------|----------------|----------|-----------|------------|
|              |            | Overall        | Upstream | Midstream | Downstream |
| Total        | Wtd Base   | 402            | 8        | 173       | 221        |
|              | Unwtd Base | 358            | 80       | 108       | 170        |
| Yes          | %          | 65             | 70       | 81        | 53         |
| No           | %          | 35             | 30       | 19        | 46         |
| I don't know | %          |                | 0        | 0         | 1          |

**104. In the past year, during which months was the availability of water not sufficient for irrigating your crops?**

|            |            | Basin location |          |           |            |
|------------|------------|----------------|----------|-----------|------------|
|            |            | Overall        | Upstream | Midstream | Downstream |
| Total      | Wtd Base   | 139            | 2        | 34        | 103        |
|            | Unwtd Base | 124            | 24       | 21        | 79         |
| Oct-18     | %          | 6              | 2        | 17        | 3          |
| Jul-19     | %          | 9              | 4        | 6         | 10         |
| Aug-19     | %          | 5              | 0        | 2         | 6          |
| Sep-19     | %          | 4              | 9        | 6         | 3          |
| Don't know | %          |                | 2        | 0         | 0          |
| Nov-18     | %          | 8              | 2        | 19        | 5          |
| Dec-18     | %          | 6              | 2        | 6         | 6          |
| Jan-19     | %          | 5              | 11       | 4         | 5          |
| Feb-19     | %          | 8              | 14       | 4         | 10         |
| Mar-19     | %          | 14             | 18       | 8         | 15         |
| Apr-19     | %          | 14             | 23       | 13        | 15         |
| May-19     | %          | 12             | 11       | 8         | 13         |
| Jun-19     | %          | 9              | 4        | 6         | 10         |

**105. What issues have you experienced in access to water for irrigation?**

|                                                  |            | Basin location |          |           |            |
|--------------------------------------------------|------------|----------------|----------|-----------|------------|
|                                                  |            | Overall        | Upstream | Midstream | Downstream |
| Total                                            | Wtd Base   | 402            | 8        | 173       | 221        |
|                                                  | Unwtd Base | 358            | 80       | 108       | 170        |
| My field is too far from the canal               | %          | 13             | 13       | 9         | 16         |
| I cannot afford to pump the water onto my fields | %          | 4              | 8        | 2         | 5          |
| No issues                                        | %          | 37             | 41       | 59        | 23         |
| I don't know                                     | %          |                | 2        | 0         | 0          |
| Other                                            | %          | 1              | 9        | 2         |            |

|                                                                          |   |    |   |    |    |
|--------------------------------------------------------------------------|---|----|---|----|----|
| Not enough tertiary canals                                               | % | 3  | 0 | 2  | 4  |
| My field is at too high elevation                                        | % | 2  | 8 | 3  | 1  |
| The upstream people take more water than they should, so I don't get any | % | 5  | 1 | 2  | 7  |
| There is not enough water late in the season                             | % | 15 | 8 | 11 | 18 |
| There is not enough water early in the season                            | % | 8  | 8 | 3  | 11 |
| The quantity of water available overall is too little                    | % | 10 | 3 | 8  | 13 |
| The timing of water does not suit my needs                               | % | 1  | 0 | 0  | 1  |
| I cannot afford the water/FWUC fees                                      | % | 1  | 1 | 2  | 1  |

**106. What do you do when you don't have enough water from your main sources?**

|                                                      |            | Basin location |          |           |            |
|------------------------------------------------------|------------|----------------|----------|-----------|------------|
|                                                      |            | Overall        | Upstream | Midstream | Downstream |
| Total                                                |            |                |          |           |            |
|                                                      | Wtd Base   | 786            | 25       | 421       | 340        |
|                                                      | Unwtd Base | 783            | 259      | 263       | 261        |
| Let crops die                                        | %          | 41             | 46       | 35        | 49         |
| Avoid planting crops, when possible                  | %          | 3              | 3        | 3         | 2          |
| Request aid from the government                      | %          | 3              |          | 1         | 5          |
| Purchase water from an alternative source            | %          | 7              | 3        | 7         | 7          |
| Transport water from elsewhere to my land            | %          | 6              | 10       | 7         | 5          |
| I always have sufficient water from the main sources | %          | 21             | 15       | 27        | 15         |
| I don't know                                         | %          | 10             | 7        | 10        | 10         |
| Other                                                | %          | 8              | 15       | 10        | 6          |

**107. What do you do when you have too much water/your fields are over flooded?**

|                                        |            | Basin location |          |           |            |
|----------------------------------------|------------|----------------|----------|-----------|------------|
|                                        |            | Overall        | Upstream | Midstream | Downstream |
| Total                                  |            |                |          |           |            |
|                                        | Wtd Base   | 786            | 25       | 421       | 340        |
|                                        | Unwtd Base | 783            | 259      | 263       | 261        |
| Pump water into the drainage ditches   | %          | 16             | 12       | 4         | 29         |
| Plant later                            | %          | 1              | 5        | 1         | 2          |
| Let crops die                          | %          | 15             | 25       | 13        | 17         |
| There is nothing I can do              | %          | 7              | 10       | 6         | 8          |
| Request aid from the government        | %          | 1              | 0        | 1         |            |
| Dig ditches myself to drain the fields | %          | 9              | 3        | 6         | 13         |
| I did not experience such a situation  | %          | 27             | 33       | 36        | 16         |
| I don't know                           | %          | 7              | 4        | 6         | 8          |
| Other                                  | %          | 18             | 8        | 28        | 7          |

**108. Who decides on the distribution/allocation of water from the irrigation system in your village?**

|                                                        |            | Basin location |          |           |            |
|--------------------------------------------------------|------------|----------------|----------|-----------|------------|
|                                                        |            | Overall        | Upstream | Midstream | Downstream |
| Total                                                  | Wtd Base   | 402            | 8        | 173       | 221        |
|                                                        | Unwtd Base | 358            | 80       | 108       | 170        |
| Regional Water Esta. (PDWRAM)                          | %          | 4              | 0        | 6         | 3          |
| District/Commune/village                               | %          | 24             | 8        | 17        | 30         |
| WUCs/ FWUCs                                            | %          | 7              | 13       | 5         | 8          |
| The oldest community members                           | %          | 3              | 4        | 0         | 6          |
| The community members who have more land               | %          | 1              | 0        | 0         | 2          |
| The community members who have the most money          | %          | 2              | 0        | 0         | 3          |
| I don't use an irrigation system/ no irrigation system | %          | 28             | 46       | 36        | 22         |
| I don't know                                           | %          | 27             | 19       | 30        | 24         |
| Other                                                  | %          | 3              | 11       | 5         | 2          |

**109. Does anyone in your household know in advance if there will be shortages in irrigation water supply?**

|              |            | Basin location |          |           |            |
|--------------|------------|----------------|----------|-----------|------------|
|              |            | Overall        | Upstream | Midstream | Downstream |
| Total        | Wtd Base   | 282            | 4        | 107       | 171        |
|              | Unwtd Base | 241            | 43       | 67        | 131        |
| Yes          | %          | 25             | 30       | 16        | 31         |
| No           | %          | 47             | 49       | 48        | 47         |
| I don't know | %          | 28             | 21       | 36        | 23         |

|                           |            | Basin location |          |           |            |
|---------------------------|------------|----------------|----------|-----------|------------|
|                           |            | Overall        | Upstream | Midstream | Downstream |
| Total                     | Wtd Base   | 71             | 1        | 18        | 52         |
|                           | Unwtd Base | 64             | 13       | 11        | 40         |
| Male household head       | %          | 53             | 41       | 57        | 53         |
| Female household head     | %          | 3              | 14       | 0         | 4          |
| Wife of household head    | %          | 27             | 23       | 36        | 25         |
| Husband of household head | %          | 4              | 0        | 7         | 4          |
| Other adult male          | %          | 7              | 9        | 0         | 9          |
| Other adult female        | %          | 4              | 14       | 0         | 5          |
| Elderly female            | %          | 1              | 0        | 0         | 2          |

**110. Who in the household receives this information?**

|                           |            | Basin location |          |           |            |
|---------------------------|------------|----------------|----------|-----------|------------|
|                           |            | Overall        | Upstream | Midstream | Downstream |
| Total                     | Wtd Base   | 71             | 1        | 18        | 52         |
|                           | Unwtd Base | 64             | 13       | 11        | 40         |
| Male household head       | %          | 53             | 41       | 57        | 53         |
| Female household head     | %          | 3              | 14       | 0         | 4          |
| Wife of household head    | %          | 27             | 23       | 36        | 25         |
| Husband of household head | %          | 4              | 0        | 7         | 4          |
| Other adult male          | %          | 7              | 9        | 0         | 9          |
| Other adult female        | %          | 4              | 14       | 0         | 5          |
| Elderly female            | %          | 1              | 0        | 0         | 2          |

**111. Who notifies you of shortages, or should be responsible for notifying you, even if they don't?**

|                                          |            | Basin location |          |           |            |
|------------------------------------------|------------|----------------|----------|-----------|------------|
|                                          |            | Overall        | Upstream | Midstream | Downstream |
| Total                                    | Wtd Base   | 71             | 1        | 18        | 52         |
|                                          | Unwtd Base | 64             | 13       | 11        | 40         |
| Regional Water Est. (PDWRAM)             | %          |                | 15       | 0         | 0          |
| District/Commune/village                 | %          | 32             | 38       | 45        | 28         |
| WUCs/ FWUCs                              | %          | 19             | 31       | 9         | 23         |
| The oldest community members             | %          | 29             | 15       | 27        | 30         |
| The community members who have more land | %          | 4              | 0        | 0         | 5          |
| I don't know                             | %          | 7              | 0        | 0         | 10         |
| Other                                    | %          | 8              | 0        | 18        | 5          |

**112. How far in advance do they notify you/your household member?**

|                                         |            | Basin location |          |           |            |
|-----------------------------------------|------------|----------------|----------|-----------|------------|
|                                         |            | Overall        | Upstream | Midstream | Downstream |
| Total                                   | Wtd Base   | 71             | 1        | 18        | 52         |
|                                         | Unwtd Base | 64             | 13       | 11        | 40         |
| That day                                | %          | 6              | 0        | 0         | 8          |
| 1-7 days                                | %          | 55             | 38       | 55        | 55         |
| 1-3 weeks                               | %          | 8              | 15       | 9         | 8          |
| 1-3 months                              | %          | 6              | 31       | 0         | 8          |
| At the beginning of the planting season | %          | 7              | 15       | 18        | 3          |
| I don't know                            | %          | 19             | 0        | 18        | 20         |

**113. Have you benefited from any project for irrigation that you have not built or invested in, during the past 5 years?**

|              |            | Basin location |          |           |            |
|--------------|------------|----------------|----------|-----------|------------|
|              |            | Overall        | Upstream | Midstream | Downstream |
| Total        | Wtd Base   | 402            | 8        | 173       | 221        |
|              | Unwtd Base | 358            | 80       | 108       | 170        |
| Yes          | %          | 18             | 15       | 10        | 24         |
| No           | %          | 77             | 79       | 80        | 74         |
| I don't know | %          | 6              | 6        | 10        | 2          |

**114. What kind of project you have benefited from?**

|                  |            | Basin location |          |           |            |
|------------------|------------|----------------|----------|-----------|------------|
|                  |            | Overall        | Upstream | Midstream | Downstream |
| Total            | Wtd Base   | 71             | 1        | 18        | 52         |
|                  | Unwtd Base | 63             | 12       | 11        | 40         |
| Other            | %          | 5              | 8        | 7         | 4          |
| Private well     | %          | 10             | 31       | 29        | 2          |
| Digging in ponds | %          | 2              | 0        | 7         | 0          |
| Pond sand filter | %          | 2              | 0        | 0         | 2          |
| Primary Canal    | %          | 44             | 23       | 21        | 53         |
| Secondary Canal  | %          | 15             | 15       | 14        | 16         |
| Tertiary canal   | %          | 19             | 23       | 21        | 18         |
| Reservoir        | %          | 3              | 0        | 0         | 4          |

**115. Are there any projects that have been developed in your community that you have not benefitted from?**

|              |            | Basin location |          |           |            |
|--------------|------------|----------------|----------|-----------|------------|
|              |            | Overall        | Upstream | Midstream | Downstream |
| Total        | Wtd Base   | 786            | 25       | 421       | 340        |
|              | Unwtd Base | 783            | 259      | 263       | 261        |
| Yes          | %          | 17             | 18       | 13        | 21         |
| No           | %          | 78             | 77       | 80        | 74         |
| I don't know | %          | 6              | 5        | 6         | 5          |

**116. What kind of projects you have not benefitted from?**

|              |            | Basin location |          |           |            |
|--------------|------------|----------------|----------|-----------|------------|
|              |            | Overall        | Upstream | Midstream | Downstream |
| Total        | Wtd Base   | 131            | 5        | 56        | 70         |
|              | Unwtd Base | 136            | 47       | 35        | 54         |
| Water pump   | %          | 1              | 0        | 0         | 1          |
| I don't know | %          | 2              | 2        | 0         | 3          |
| Other        | %          | 14             | 13       | 13        | 14         |

|                  |   |    |    |    |    |
|------------------|---|----|----|----|----|
| Private well     | % | 35 | 58 | 46 | 27 |
| Digging in ponds | % | 7  | 2  | 5  | 8  |
| Pond sand filter | % | 12 | 16 | 8  | 15 |
| Primary Canal    | % | 12 | 2  | 21 | 7  |
| Secondary Canal  | % | 5  | 0  | 3  | 7  |
| Tertiary canal   | % | 9  | 5  | 5  | 13 |
| Reservoir        | % | 2  | 2  | 0  | 4  |

**117. Has your household made any personal investments to improve the provision of irrigation on your lands?**

|              |            | Basin location |          |           |            |
|--------------|------------|----------------|----------|-----------|------------|
|              |            | Overall        | Upstream | Midstream | Downstream |
| Total        | Wtd Base   | 726            | 22       | 381       | 323        |
|              | Unwtd Base | 709            | 223      | 238       | 248        |
| Yes          | %          | 39             | 30       | 36        | 43         |
| No           | %          | 61             | 70       | 64        | 57         |
| I don't know | %          |                | 0        |           | 0          |

**118. Who participates in discussions about irrigation supply and planning at the household level?**

|                           |            | Basin location |          |           |            |
|---------------------------|------------|----------------|----------|-----------|------------|
|                           |            | Overall        | Upstream | Midstream | Downstream |
| Total                     | Wtd Base   | 726            | 22       | 381       | 323        |
|                           | Unwtd Base | 709            | 223      | 238       | 248        |
| Male household head       | %          | 37             | 39       | 34        | 41         |
| Female child              | %          |                | 1        |           |            |
| No one                    | %          | 16             | 15       | 22        | 11         |
| I don't know              | %          |                | 0        | 0         | 1          |
| Other                     | %          |                | 0        |           |            |
| Female household head     | %          | 7              | 6        | 7         | 8          |
| Wife of household head    | %          | 26             | 30       | 24        | 27         |
| Husband of household head | %          | 3              | 1        | 3         | 2          |
| Other adult male          | %          | 4              | 3        | 5         | 4          |
| Other adult female        | %          | 3              | 2        | 3         | 4          |
| Elderly male              | %          | 1              | 1        | 1         | 1          |
| Elderly female            | %          | 1              | 2        | 1         | 1          |
| Male child                | %          |                | 0        | 0         |            |

**119. Who in your household participates in discussions about irrigation supply and planning in the community?**

|  | Basin location |
|--|----------------|
|--|----------------|

|                           |            | Overall | Upstream | Midstream | Downstream |
|---------------------------|------------|---------|----------|-----------|------------|
| Total                     | Wtd Base   | 540     | 17       | 258       | 266        |
|                           | Unwtd Base | 534     | 169      | 161       | 204        |
| Male household head       | %          | 19      | 16       | 15        | 22         |
| No one                    | %          | 60      | 61       | 67        | 54         |
| I don't know              | %          | 2       | 3        | 1         | 2          |
| Other                     | %          | 1       | 0        | 1         |            |
| Female household head     | %          | 4       | 2        | 3         | 4          |
| Wife of household head    | %          | 12      | 13       | 10        | 14         |
| Husband of household head | %          | 1       | 1        | 1         | 1          |
| Other adult male          | %          | 1       | 3        | 1         |            |
| Other adult female        | %          | 1       | 2        | 1         | 1          |
| Elderly male              | %          |         | 0        | 0         |            |
| Elderly female            | %          |         | 0        | 0         | 1          |

**120. Do you or other household member feel that your/ their voice is heard?**

|              |            | Basin location |          |           |            |
|--------------|------------|----------------|----------|-----------|------------|
|              |            | Overall        | Upstream | Midstream | Downstream |
| Total        | Wtd Base   | 184            | 5        | 74        | 106        |
|              | Unwtd Base | 178            | 51       | 46        | 81         |
| Yes          | %          | 49             | 69       | 46        | 51         |
| No           | %          | 15             | 10       | 13        | 17         |
| I don't know | %          | 35             | 22       | 41        | 32         |

**121. Who is primarily responsible for managing/maintaining your irrigation water source throughout the year?**

|                           |            | Basin location |          |           |            |
|---------------------------|------------|----------------|----------|-----------|------------|
|                           |            | Overall        | Upstream | Midstream | Downstream |
| Total                     | Wtd Base   | 726            | 22       | 381       | 323        |
|                           | Unwtd Base | 709            | 223      | 238       | 248        |
| Male household head       | %          | 41             | 50       | 36        | 46         |
| Female child              | %          |                | 1        |           | 0          |
| No one                    | %          | 22             | 11       | 29        | 16         |
| I don't know              | %          | 1              | 1        |           | 1          |
| Other                     | %          | 1              | 0        | 2         | 0          |
| Female household head     | %          | 7              | 6        | 7         | 5          |
| Wife of household head    | %          | 14             | 21       | 12        | 17         |
| Husband of household head | %          | 4              | 1        | 4         | 4          |
| Other adult male          | %          | 5              | 4        | 5         | 6          |
| Other adult female        | %          | 2              | 2        | 2         | 2          |
| Elderly male              | %          | 1              | 2        | 1         | 2          |
| Elderly female            | %          | 1              | 2        | 1         | 1          |
| Male child                | %          | 1              | 1        | 1         | 0          |

**122. Is there a FWUC in your village/community?**

|           |            | Basin location |          |           |                |
|-----------|------------|----------------|----------|-----------|----------------|
|           |            | Overall        | Upstream | Midstream | Downstre<br>am |
| Total     | Wtd Base   | 812            | 27       | 427       | 358            |
|           | Unwtd Base | 812            | 270      | 267       | 275            |
| Yes       | %          | 12             | 11       | 8         | 16             |
| No        | %          | 75             | 84       | 79        | 70             |
| Dont know | %          | 13             | 5        | 13        | 14             |

**123. Does your family belong to your local FWUC?**

|       |            | Basin location |          |           |                |
|-------|------------|----------------|----------|-----------|----------------|
|       |            | Overall        | Upstream | Midstream | Downstre<br>am |
| Total | Wtd Base   | 94             | 3        | 34        | 57             |
|       | Unwtd Base | 94             | 29       | 21        | 44             |
| Yes   | %          | 42             | 48       | 19        | 55             |
| No    | %          | 58             | 52       | 81        | 45             |

**124. Who attends FWUC meetings?**

|                        |            | Basin location |          |           |                |
|------------------------|------------|----------------|----------|-----------|----------------|
|                        |            | Overall        | Upstream | Midstream | Downstre<br>am |
| Total                  | Wtd Base   | 39             | 1        | 6         | 31             |
|                        | Unwtd Base | 42             | 14       | 4         | 24             |
| Male household head    | %          | 53             | 47       | 60        | 52             |
| No one                 | %          | 6              | 5        | 0         | 7              |
| Female household head  | %          | 15             | 5        | 20        | 15             |
| Wife of household head | %          | 22             | 32       | 20        | 22             |
| Other adult male       | %          |                | 11       | 0         | 0              |
| Elderly female         | %          | 3              | 0        | 0         | 4              |

**125. Do you/ they participate in/speak up at FWUC meetings?**

|       |            | Basin location |          |           |                |
|-------|------------|----------------|----------|-----------|----------------|
|       |            | Overall        | Upstream | Midstream | Downstre<br>am |
| Total | Wtd Base   | 36             | 1        | 6         | 29             |
|       | Unwtd Base | 39             | 13       | 4         | 22             |
| Yes   | %          | 66             | 69       | 75        | 64             |
| No    | %          | 26             | 8        | 25        | 27             |

|           |   |   |    |   |   |
|-----------|---|---|----|---|---|
| Dont know | % | 8 | 23 | 0 | 9 |
|-----------|---|---|----|---|---|

**126. Do you feel yours and/or your households' concerns are heard and addressed by your FWUC?**

|              |            | Basin location |          |           |                |
|--------------|------------|----------------|----------|-----------|----------------|
|              |            | Overall        | Upstream | Midstream | Downstre<br>am |
| Total        | Wtd Base   | 36             | 1        | 6         | 29             |
|              | Unwtd Base | 39             | 13       | 4         | 22             |
| Yes          | %          | 81             | 69       | 100       | 77             |
| No           | %          | 15             | 8        | 0         | 18             |
| I don't know | %          | 4              | 23       | 0         | 5              |

**127. Do you/someone in your household know how your FWUC sets irrigation schedules and fees?**

|              |            | Basin location |          |           |                |
|--------------|------------|----------------|----------|-----------|----------------|
|              |            | Overall        | Upstream | Midstream | Downstre<br>am |
| Total        | Wtd Base   | 39             | 1        | 6         | 31             |
|              | Unwtd Base | 42             | 14       | 4         | 24             |
| Yes          | %          | 57             | 64       | 50        | 58             |
| No           | %          | 36             | 36       | 50        | 33             |
| I don't know | %          | 7              | 0        | 0         | 8              |

**128. How does your FWUC set irrigation schedules?**

|                                             |            | Basin location |          |           |                |
|---------------------------------------------|------------|----------------|----------|-----------|----------------|
|                                             |            | Overall        | Upstream | Midstream | Downstre<br>am |
| Total                                       | Wtd Base   | 22             | 1        | 3         | 18             |
|                                             | Unwtd Base | 25             | 9        | 2         | 14             |
| With a set schedule with farmer input       | %          | 56             | 89       | 0         | 64             |
| With a set schedule without farmer input    | %          | 13             | 0        | 50        | 7              |
| When farmers ask for water, they release it | %          | 25             | 11       | 50        | 21             |
| No set schedules Other                      | %          | 6              | 0        | 0         | 7              |

**129. Do you or does someone in your household participate in mining activities to generate income?**

|       |            | Basin location |          |           |                |
|-------|------------|----------------|----------|-----------|----------------|
|       |            | Overall        | Upstream | Midstream | Downstre<br>am |
| Total | Wtd Base   | 812            | 27       | 427       | 358            |
|       | Unwtd Base | 812            | 270      | 267       | 275            |
| Me    | %          |                | 4        | 0         | 0              |

|                         |   |     |    |     |     |
|-------------------------|---|-----|----|-----|-----|
| Someone in my household | % |     | 3  | 0   | 0   |
| No one                  | % | 100 | 93 | 100 | 100 |
| I don't know            | % |     |    | 0   | 0   |

**130. What role does water play in your/your household's mining work?**

|                                                                            |            | Basin location |          | Gender |        |
|----------------------------------------------------------------------------|------------|----------------|----------|--------|--------|
|                                                                            |            | Overall        | Upstream | Male   | Female |
| Total                                                                      |            |                |          |        |        |
|                                                                            | Wtd Base   | 2              | 2        | 1      | 1      |
|                                                                            | Unwtd Base | 18             | 18       | 12     | 6      |
| A certain amount of water is needed to remove / separate metals / minerals | %          | 28             | 28       | 42     | 0      |
| Good water quality is needed to remove/separate metals / minerals          | %          | 56             | 56       | 42     | 83     |
| Water influences the amount of metal/mineral removed                       | %          | 6              | 6        | 0      | 17     |
| It does not play a major role/is not important                             | %          | 6              | 6        | 8      | 0      |
| I don't know                                                               | %          | 6              | 6        | 8      | 0      |

**131. What are the main problems related with mining activities in your watershed?**

|                                             |            | Basin location |          |           |            |
|---------------------------------------------|------------|----------------|----------|-----------|------------|
|                                             |            | Overall        | Upstream | Midstream | Downstream |
| Total                                       |            |                |          |           |            |
|                                             | Wtd Base   | 812            | 27       | 427       | 358        |
|                                             | Unwtd Base | 812            | 270      | 267       | 275        |
| Low salaries/payment                        | %          |                |          |           | 0          |
| Health problems for workers                 | %          | 3              | 9        | 3         | 2          |
| Health problems for other community members | %          |                | 1        | 0         | 1          |
| Damaging to the environment                 | %          | 4              | 4        | 4         | 4          |
| Deforestation                               | %          | 1              | 1        |           | 1          |
| Habitat loss                                | %          |                |          |           |            |
| Water pollution                             | %          | 1              | 6        |           | 2          |
| Soil pollution                              | %          |                | 1        | 0         | 1          |
| Only benefits a few                         | %          |                | 0        |           | 0          |
| Financial loss                              | %          |                | 1        | 0         |            |
| There are no problems                       | %          | 12             | 4        | 13        | 12         |
| I don't know                                | %          | 75             | 65       | 77        | 75         |
| Other                                       | %          | 2              | 9        | 1         | 3          |

**132. What are the main benefits related with mining activities in your watershed?**

|       |          | Basin location |          |           |            |
|-------|----------|----------------|----------|-----------|------------|
|       |          | Overall        | Upstream | Midstream | Downstream |
| Total |          |                |          |           |            |
|       | Wtd Base | 812            | 27       | 427       | 358        |

|                         |            |     |     |     |     |
|-------------------------|------------|-----|-----|-----|-----|
|                         | Unwtd Base | 812 | 270 | 267 | 275 |
| Good salaries/payment   | %          | 9   | 25  | 5   | 12  |
| Good for the economy    | %          | 3   |     | 4   | 2   |
| Good for the government | %          |     | 0   | 0   |     |
| There are no benefits   | %          | 4   | 8   | 3   | 5   |
| I don't know            | %          | 84  | 66  | 87  | 81  |
| Other                   | %          |     |     | 0   | 0   |

**133. Do you or does someone in your household fish?**

|                         |            | Basin location |          |           |            |
|-------------------------|------------|----------------|----------|-----------|------------|
|                         |            | Overall        | Upstream | Midstream | Downstream |
| Total                   | Wtd Base   | 812            | 27       | 427       | 358        |
|                         | Unwtd Base | 812            | 270      | 267       | 275        |
| Me                      | %          | 14             | 15       | 14        | 14         |
| Someone in my household | %          | 11             | 16       | 12        | 11         |
| No one                  | %          | 75             | 69       | 75        | 75         |

**134. Is this for selling or for food supply?**

|             |            | Basin location |          |           |            |
|-------------|------------|----------------|----------|-----------|------------|
|             |            | Overall        | Upstream | Midstream | Downstream |
| Total       | Wtd Base   | 207            | 8        | 109       | 90         |
|             | Unwtd Base | 221            | 84       | 68        | 69         |
| Selling     | %          | 2              | 0        | 0         | 4          |
| Food supply | %          | 70             | 93       | 74        | 64         |
| Both        | %          | 28             | 7        | 26        | 32         |

**135. Who is in charge of selling the fish in your household?**

|                                          |            | Basin location |          |           |            |
|------------------------------------------|------------|----------------|----------|-----------|------------|
|                                          |            | Overall        | Upstream | Midstream | Downstream |
| Total                                    | Wtd Base   | 62             | 1        | 29        | 33         |
|                                          | Unwtd Base | 49             | 6        | 18        | 25         |
| Husband or head male                     | %          | 9              | 0        | 6         | 12         |
| Spouse or head female                    | %          | 80             | 67       | 94        | 68         |
| Both heads of household, male and female | %          | 9              | 33       | 0         | 16         |
| Daughter(s)                              | %          | 2              | 0        | 0         | 4          |

**136. Who decides how to spend this money in your household?**

|                                          |            | Basin location |          |           |            |
|------------------------------------------|------------|----------------|----------|-----------|------------|
|                                          |            | Overall        | Upstream | Midstream | Downstream |
| Total                                    | Wtd Base   | 62             | 1        | 29        | 33         |
|                                          | Unwtd Base | 49             | 6        | 18        | 25         |
| Husband or head male                     | %          | 5              | 0        | 6         | 4          |
| Spouse or head female                    | %          | 78             | 50       | 94        | 64         |
| Both heads of household, male and female | %          | 15             | 50       | 0         | 28         |
| Daughter(s)                              | %          | 2              | 0        | 0         | 4          |

**137. What percentage is for food supply?**

|               |            | Basin location |          |           |            |
|---------------|------------|----------------|----------|-----------|------------|
|               |            | Overall        | Upstream | Midstream | Downstream |
| Total         | Wtd Base   | 58             | 1        | 29        | 29         |
|               | Unwtd Base | 46             | 6        | 18        | 22         |
| Less than 50% | %          | 67             | 33       | 61        | 73         |
| More than 50% | %          | 29             | 67       | 39        | 18         |
| I don't know  | %          | 4              | 0        | 0         | 9          |

**138. Where do you/they fish?**

|                       |            | Basin location |          |           |            |
|-----------------------|------------|----------------|----------|-----------|------------|
|                       |            | Overall        | Upstream | Midstream | Downstream |
| Total                 | Wtd Base   | 207            | 8        | 109       | 90         |
|                       | Unwtd Base | 221            | 84       | 68        | 69         |
| River                 | %          | 8              | 0        | 0         | 17         |
| Stream                | %          | 28             | 50       | 35        | 20         |
| Lake/ reservoir/ pond | %          | 15             | 16       | 12        | 19         |
| Canal                 | %          | 20             | 13       | 19        | 21         |
| Rice field            | %          | 27             | 17       | 31        | 24         |
| I don't know          | %          | 1              | 0        | 1         | 0          |
| Other                 | %          | 1              | 3        | 1         | 0          |

**139. Did you/they change locations in the last 5 years?**

|       |            | Basin location |          |           |            |
|-------|------------|----------------|----------|-----------|------------|
|       |            | Overall        | Upstream | Midstream | Downstream |
| Total | Wtd Base   | 207            | 8        | 109       | 90         |
|       | Unwtd Base | 221            | 84       | 68        | 69         |
| Yes   | %          | 7              | 5        | 1         | 14         |
| No    | %          | 93             | 95       | 99        | 86         |

**140. Why was the fishing location changed?**

|                                       |            | Basin location |          |           |                |
|---------------------------------------|------------|----------------|----------|-----------|----------------|
|                                       |            | Overall        | Upstream | Midstream | Downstre<br>am |
| Total                                 | Wtd Base   | 15             |          | 2         | 13             |
|                                       | Unwtd Base | 15             | 4        | 1         | 10             |
| Fish reduction in the first place     | %          | 70             | 67       | 100       | 67             |
| Too many fishermen in the first place | %          | 22             | 17       | 0         | 25             |
| Others                                | %          | 8              | 17       | 0         | 8              |

**141. How many kg of fish do you or your family typically catch per week during the fishing season?**

|       |            | Basin location |          |           |                |
|-------|------------|----------------|----------|-----------|----------------|
|       |            | Overall        | Upstream | Midstream | Downstre<br>am |
| Total | Wtd Base   | 207            | 8        | 109       | 90             |
|       | Unwtd Base | 221            | 84       | 68        | 69             |
| 0.5   | %          | 2              | 0        | 3         | 0              |
| 1     | %          | 11             | 5        | 10        | 12             |
| 2     | %          | 17             | 13       | 25        | 9              |
| 3     | %          | 10             | 15       | 9         | 12             |
| 4     | %          | 8              | 7        | 10        | 6              |
| 5     | %          | 9              | 2        | 9         | 9              |
| 6     | %          | 1              | 0        | 1         | 0              |
| 7     | %          | 5              | 26       | 3         | 6              |
| 8     | %          | 2              | 0        | 3         | 1              |
| 10    | %          | 5              | 13       | 1         | 9              |
| 12    | %          |                | 1        | 0         | 0              |
| 14    | %          | 3              | 4        | 4         | 1              |
| 15    | %          |                | 1        | 0         | 0              |
| 20    | %          | 5              | 1        | 6         | 4              |
| 21    | %          | 1              | 0        | 1         | 1              |
| 25    | %          |                | 1        | 0         | 0              |
| 30    | %          | 1              | 1        | 1         | 1              |
| 35    | %          | 3              | 0        | 1         | 6              |
| 40    | %          | 2              | 0        | 1         | 3              |
| 50    | %          | 2              | 0        | 1         | 3              |
| 60    | %          | 1              | 1        | 0         | 1              |
| 70    | %          | 1              | 0        | 1         | 1              |
| 100   | %          | 1              | 0        | 1         | 0              |
| 300   | %          | 1              | 0        | 0         | 3              |
| 500   | %          | 1              | 0        | 0         | 3              |
| 700   | %          | 2              | 0        | 0         | 4              |
| 900   | %          | 1              | 0        | 0         | 1              |
| DK/CS | %          | 4              | 7        | 4         | 3              |

**142. Is this enough to meet your family needs?**

|                     |            | Basin location |          |           |            |
|---------------------|------------|----------------|----------|-----------|------------|
|                     |            | Overall        | Upstream | Midstream | Downstream |
| Total               | Wtd Base   | 207            | 8        | 109       | 90         |
|                     | Unwtd Base | 221            | 84       | 68        | 69         |
| Enough for food     | %          | 39             | 35       | 34        | 46         |
| Enough for selling  | %          | 15             | 1        | 13        | 20         |
| Not enough for food | %          | 35             | 45       | 43        | 25         |
| Not enough selling  | %          | 10             | 20       | 10        | 9          |

**143. Do you/your household member have a limit/quota for fish caught?**

|              |            | Basin location |          |           |            |
|--------------|------------|----------------|----------|-----------|------------|
|              |            | Overall        | Upstream | Midstream | Downstream |
| Total        | Wtd Base   | 207            | 8        | 109       | 90         |
|              | Unwtd Base | 221            | 84       | 68        | 69         |
| Yes          | %          | 1              | 0        | 0         | 1          |
| No           | %          | 99             | 100      | 100       | 97         |
| I don't know | %          | 1              | 0        | 0         | 1          |

**144. What is the limit or quota in kilograms (kgs)?**

|       |            | Basin location |            | Gender |        |
|-------|------------|----------------|------------|--------|--------|
|       |            | Overall        | Downstream | Male   | Female |
| Total | Wtd Base   | 1              | 1          | 0      | 1      |
|       | Unwtd Base | 1              | 1          | 0      | 1      |
| DK/CS | %          | 100            | 100        | 0      | 100    |

**145. What are the main problems you/your household member face as a fisher?**

|                                    |            | Basin location |          |           |            |
|------------------------------------|------------|----------------|----------|-----------|------------|
|                                    |            | Overall        | Upstream | Midstream | Downstream |
| Total                              | Wtd Base   | 207            | 8        | 109       | 90         |
|                                    | Unwtd Base | 221            | 84       | 68        | 69         |
| Fish reduction                     | %          | 38             | 43       | 45        | 31         |
| Do not face problems               | %          | 16             | 7        | 20        | 12         |
| Low flows in the river are too low | %          | 4              | 5        | 3         | 5          |
| I don't know                       | %          | 3              | 3        | 3         | 3          |
| Other                              | %          | 1              | 3        | 0         | 1          |
| Overfishing                        | %          | 14             | 15       | 11        | 16         |
| Water pollution from mining        | %          |                | 1        | 0         | 0          |

|                                                        |   |    |    |    |    |
|--------------------------------------------------------|---|----|----|----|----|
| Water pollution from agriculture                       | % | 6  | 3  | 5  | 7  |
| Water pollution from households/human waste            | % |    | 0  | 0  | 1  |
| No markets for fish                                    | % | 1  | 0  | 0  | 2  |
| Fishing lots make preferred fishing areas inaccessible | % | 1  | 0  | 0  | 2  |
| Illegal fishing gear                                   | % | 16 | 21 | 13 | 19 |

**146. Which activities do you feel affect fishers?**

|                 |            | Basin location |          |           |            |
|-----------------|------------|----------------|----------|-----------|------------|
|                 |            | Overall        | Upstream | Midstream | Downstream |
| Total           | Wtd Base   | 207            | 8        | 109       | 90         |
|                 | Unwtd Base | 221            | 84       | 68        | 69         |
| Mining          | %          |                | 2        | 0         | 0          |
| Deforestation   | %          | 6              | 2        | 6         | 6          |
| Farming         | %          | 10             | 7        | 7         | 13         |
| Overfishing     | %          | 18             | 22       | 16        | 20         |
| Dams/Reservoirs | %          | 2              | 4        | 2         | 2          |
| Illegal fishing | %          | 39             | 39       | 40        | 38         |
| I don't know    | %          | 22             | 18       | 24        | 20         |
| Other           | %          | 3              | 6        | 5         | 2          |

**147. Who participates in discussions and decision making about fishing at the household level?**

|                           |            | Basin location |          |           |            |
|---------------------------|------------|----------------|----------|-----------|------------|
|                           |            | Overall        | Upstream | Midstream | Downstream |
| Total                     | Wtd Base   | 207            | 8        | 109       | 90         |
|                           | Unwtd Base | 221            | 84       | 68        | 69         |
| Male household head       | %          | 51             | 50       | 49        | 53         |
| Female child              | %          | 1              | 0        | 1         | 0          |
| No one                    | %          | 6              | 2        | 9         | 4          |
| Female household head     | %          | 3              | 5        | 6         | 0          |
| Wife of household head    | %          | 23             | 25       | 19        | 27         |
| Husband of household head | %          | 5              | 4        | 9         | 1          |
| Other adult male          | %          | 7              | 9        | 4         | 11         |
| Other adult female        | %          | 1              | 3        | 1         | 1          |
| Male child                | %          | 3              | 2        | 2         | 3          |

**148. Who participates in your Community Fisheries Management Systems, from your household?**

|       |            | Basin location |          |           |            |
|-------|------------|----------------|----------|-----------|------------|
|       |            | Overall        | Upstream | Midstream | Downstream |
| Total | Wtd Base   | 207            | 8        | 109       | 90         |
|       | Unwtd Base | 221            | 84       | 68        | 69         |

|                                  |   |    |    |    |    |
|----------------------------------|---|----|----|----|----|
| Male household head              | % | 3  | 0  | 3  | 3  |
| No one                           | % | 39 | 37 | 44 | 33 |
| I don't know                     | % | 9  | 2  | 10 | 7  |
| There are no Community Fisheries | % | 48 | 60 | 43 | 54 |
| Female household head            | % | 1  | 0  | 0  | 1  |
| Other adult male                 | % |    | 1  | 0  | 0  |
| Male child                       | % | 1  | 0  | 0  | 1  |

**149. Do you feel your concerns are heard and addressed by the Community Fisheries Management Systems?**

|              |            | Basin location |          |           |            |
|--------------|------------|----------------|----------|-----------|------------|
|              |            | Overall        | Upstream | Midstream | Downstream |
| Total        | Wtd Base   | 7              |          | 3         | 4          |
|              | Unwtd Base | 6              | 1        | 2         | 3          |
| Yes          | %          | 1              | 100      | 0         | 0          |
| No           | %          | 36             | 0        | 0         | 67         |
| I don't know | %          | 62             | 0        | 100       | 33         |

**150. Did you have any shortages of food for the family needs in the last 12 months?**

|       |            | Basin location |          |           |            |
|-------|------------|----------------|----------|-----------|------------|
|       |            | Overall        | Upstream | Midstream | Downstream |
| Total | Wtd Base   | 812            | 27       | 427       | 358        |
|       | Unwtd Base | 812            | 270      | 267       | 275        |
| Yes   | %          | 10             | 21       | 13        | 7          |
| No    | %          | 90             | 79       | 87        | 93         |

**151. To what extent has food shortages in your home been affected by water-related problems the last 12 months?**

|                |            | Basin location |          |           |            |
|----------------|------------|----------------|----------|-----------|------------|
|                |            | Overall        | Upstream | Midstream | Downstream |
| Total          | Wtd Base   | 84             | 6        | 54        | 23         |
|                | Unwtd Base | 110            | 58       | 34        | 18         |
| Largely        | %          | 27             | 26       | 29        | 22         |
| To some extent | %          | 65             | 69       | 62        | 72         |
| Not at all     | %          | 8              | 5        | 9         | 6          |

**152. What were the main natural disasters your household faced the last 12 months?**

|       |          | Basin location |          |           |            |
|-------|----------|----------------|----------|-----------|------------|
|       |          | Overall        | Upstream | Midstream | Downstream |
| Total | Wtd Base | 812            | 27       | 427       | 358        |

|            |            |     |     |     |     |
|------------|------------|-----|-----|-----|-----|
|            | Unwtd Base | 812 | 270 | 267 | 275 |
| Droughts   | %          | 26  | 35  | 18  | 36  |
| Floods     | %          | 6   | 4   | 5   | 7   |
| Wind Storm | %          | 6   | 3   | 4   | 8   |
| Other      | %          | 1   | 0   | 1   | 1   |
| None       | %          | 61  | 58  | 72  | 49  |

**153. What were the main problems your household faced because of droughts?**

|                                                  |            | Basin location |          |           |            |
|--------------------------------------------------|------------|----------------|----------|-----------|------------|
|                                                  |            | Overall        | Upstream | Midstream | Downstream |
| Total                                            | Wtd Base   | 224            | 10       | 78        | 135        |
|                                                  | Unwtd Base | 251            | 98       | 49        | 104        |
| Loss of crops                                    | %          | 61             | 58       | 69        | 58         |
| Other                                            | %          | 1              | 1        | 0         | 2          |
| Loss of livestock / poultry                      | %          | 9              | 8        | 6         | 10         |
| Low crop productivity                            | %          | 18             | 29       | 15        | 19         |
| Insufficient income to cover food at home        | %          | 5              | 3        | 6         | 5          |
| Additional work or jobs of the head of household | %          | 2              | 0        | 1         | 2          |
| Minor sons had to seek employment                | %          |                | 1        | 0         | 0          |
| Minor daughters had to seek employment           | %          | 1              | 0        | 1         | 1          |
| Migration of a member of your household          | %          | 2              | 1        | 1         | 2          |
| Destroyed homes/ property                        | %          | 1              | 0        | 0         | 1          |

**153. What were the main problems your household faced because of floods?**

|                                                  |            | Basin location |          |           |            |
|--------------------------------------------------|------------|----------------|----------|-----------|------------|
|                                                  |            | Overall        | Upstream | Midstream | Downstream |
| Total                                            | Wtd Base   | 48             | 1        | 21        | 26         |
|                                                  | Unwtd Base | 44             | 11       | 13        | 20         |
| Loss of crops                                    | %          | 70             | 53       | 65        | 77         |
| Other                                            | %          | 2              | 0        | 0         | 5          |
| Loss of livestock / poultry                      | %          | 5              | 12       | 10        | 0          |
| Low crop productivity                            | %          | 12             | 18       | 15        | 9          |
| Insufficient income to cover food at home        | %          | 5              | 6        | 10        | 0          |
| Additional work or jobs of the head of household | %          | 2              | 0        | 0         | 5          |
| Destroyed homes/ property                        | %          | 2              | 12       | 0         | 5          |

**153. What were the main problems your household faced because of wind storm?**

|  | Basin location |
|--|----------------|
|--|----------------|

|                             |            | Overall | Upstream | Midstream | Downstream |
|-----------------------------|------------|---------|----------|-----------|------------|
| Total                       | Wtd Base   | 49      | 1        | 19        | 29         |
|                             | Unwtd Base | 43      | 9        | 12        | 22         |
| Loss of crops               | %          | 14      | 33       | 15        | 12         |
| Other                       | %          | 12      | 0        | 8         | 16         |
| Loss of livestock / poultry | %          | 5       | 0        | 0         | 8          |
| Low crop productivity       | %          |         | 17       | 0         | 0          |
| Destroyed homes/ property   | %          | 69      | 50       | 77        | 64         |

**153. What were the main problems your household faced because of any other disaster?**

|                                                  |            | Basin location |          |           |            |
|--------------------------------------------------|------------|----------------|----------|-----------|------------|
|                                                  |            | Overall        | Upstream | Midstream | Downstream |
| Total                                            | Wtd Base   | 7              |          | 5         | 3          |
|                                                  | Unwtd Base | 5              |          | 3         | 2          |
| Loss of livestock / poultry                      | %          | 16             |          | 13        | 25         |
| Low crop productivity                            | %          | 9              |          | 13        | 0          |
| Insufficient income to cover food at home        | %          | 16             |          | 13        | 25         |
| Additional work or jobs of the head of household | %          | 27             |          | 38        | 0          |
| Minor sons had to seek employment                | %          | 9              |          | 13        | 0          |
| Migration of a member of your household          | %          | 16             |          | 13        | 25         |
| Destroyed homes/ property                        | %          | 7              |          | 0         | 25         |

**154. What is the status of your house?**

|                                      |            | Basin location |          |           |            |
|--------------------------------------|------------|----------------|----------|-----------|------------|
|                                      |            | Overall        | Upstream | Midstream | Downstream |
| Total                                | Wtd Base   | 812            | 27       | 427       | 358        |
|                                      | Unwtd Base | 812            | 270      | 267       | 275        |
| Own house (fully paid)               | %          | 79             | 84       | 76        | 81         |
| Own house (we are paying for it)     | %          | 3              | 2        | 5         | 2          |
| Own house (inherited)                | %          | 12             | 7        | 13        | 11         |
| Rented                               | %          |                | 1        | 0         |            |
| Lent (from a relative, friend, etc.) | %          | 4              | 5        | 3         | 4          |
| Other                                | %          | 2              |          | 2         | 1          |

**155. Whose name is the house under?**

|       |          | Basin location |          |           |            |
|-------|----------|----------------|----------|-----------|------------|
|       |          | Overall        | Upstream | Midstream | Downstream |
| Total | Wtd Base | 812            | 27       | 427       | 358        |

|                           |            |     |     |     |     |
|---------------------------|------------|-----|-----|-----|-----|
|                           | Unwtd Base | 812 | 270 | 267 | 275 |
| Male household head       | %          | 37  | 41  | 38  | 36  |
| Female child              | %          |     | 0   | 0   | 1   |
| No one                    | %          | 1   | 2   | 1   | 1   |
| I don't know              | %          |     |     | 0   | 0   |
| Other                     | %          |     |     | 0   |     |
| Female household head     | %          | 11  | 7   | 11  | 11  |
| Wife of household head    | %          | 36  | 40  | 37  | 35  |
| Husband of household head | %          | 4   | 3   | 4   | 5   |
| Other adult male          | %          | 1   |     | 1   | 2   |
| Other adult female        | %          | 3   | 1   | 3   | 2   |
| Elderly male              | %          | 2   | 2   | 2   | 3   |
| Elderly female            | %          | 4   | 3   | 3   | 4   |
| Male child                | %          |     | 0   | 0   | 1   |

**156. How many bedrooms does your home have?**

|       |            | Basin location |          |           |            |
|-------|------------|----------------|----------|-----------|------------|
|       |            | Overall        | Upstream | Midstream | Downstream |
| Total | Wtd Base   | 812            | 27       | 427       | 358        |
|       | Unwtd Base | 812            | 270      | 267       | 275        |
| 1     | %          | 48             | 65       | 49        | 45         |
| 2     | %          | 36             | 31       | 40        | 33         |
| 3     | %          | 12             | 4        | 9         | 17         |
| 4     | %          | 3              | 0        | 3         | 3          |
| 5     | %          |                | 0        | 0         | 1          |
| 7     | %          |                | 0        | 0         |            |

**157. What kind of toilet facility do members of your household usually use?**

|                                     |            | Basin location |          |           |            |
|-------------------------------------|------------|----------------|----------|-----------|------------|
|                                     |            | Overall        | Upstream | Midstream | Downstream |
| Total                               | Wtd Base   | 812            | 27       | 427       | 358        |
|                                     | Unwtd Base | 812            | 270      | 267       | 275        |
| Pour flush to don't know where      | %          | 1              |          | 1         | 1          |
| Dry pit latrines                    | %          |                | 1        | 0         | 0          |
| Pit latrine with slab               | %          |                | 0        |           |            |
| Pit latrine without slab / Open pit | %          | 1              |          | 1         | 0          |
| Composting toilets                  | %          |                |          | 0         | 0          |
| Twin pit without slab               | %          |                |          |           | 0          |
| Flush to septic tank                | %          | 2              | 1        | 1         | 3          |
| Hanging toilet / hanging latrine    | %          |                | 0        |           | 0          |
| No facility / Bush / Field          | %          | 12             | 45       | 12        | 11         |
| Other                               | %          |                | 0        | 1         | 0          |

|                                  |   |    |    |    |    |
|----------------------------------|---|----|----|----|----|
| Pour flush to piped sewer system | % | 3  | 4  | 1  | 4  |
| Pour flush to septic tank        | % | 80 | 47 | 81 | 81 |
| Pour flush to pit latrine        | % |    | 1  |    |    |

**158. Do you share this facility with other households?**

|       |            | Basin location |          |           |            |
|-------|------------|----------------|----------|-----------|------------|
|       |            | Overall        | Upstream | Midstream | Downstream |
| Total | Wtd Base   | 710            | 14       | 378       | 318        |
|       | Unwtd Base | 627            | 147      | 236       | 244        |
| Yes   | %          | 33             | 27       | 36        | 29         |
| No    | %          | 67             | 73       | 64        | 71         |

**159. Where is it located?**

|                                            |            | Basin location |          |           |            |
|--------------------------------------------|------------|----------------|----------|-----------|------------|
|                                            |            | Overall        | Upstream | Midstream | Downstream |
| Total                                      | Wtd Base   | 710            | 14       | 378       | 318        |
|                                            | Unwtd Base | 627            | 147      | 236       | 244        |
| Within your house                          | %          | 18             | 16       | 14        | 23         |
| Outside the house but within your property | %          | 73             | 73       | 76        | 70         |
| Outside your property                      | %          | 9              | 11       | 10        | 7          |

**160. Does your household have the following assets?**

|                                                   |            | Basin location |          |           |            |
|---------------------------------------------------|------------|----------------|----------|-----------|------------|
|                                                   |            | Overall        | Upstream | Midstream | Downstream |
| Total                                             | Wtd Base   | 812            | 27       | 427       | 358        |
|                                                   | Unwtd Base | 812            | 270      | 267       | 275        |
| Kitchen (gas, electric, etc.), oven               | %          | 64             | 53       | 65        | 65         |
| Room furniture (bed, chairs, table, sofa, closet) | %          | 61             | 54       | 61        | 61         |
| Water pump                                        | %          | 58             | 35       | 54        | 64         |
| Internet at home                                  | %          | 5              | 7        | 4         | 6          |
| Car                                               | %          | 5              | 4        | 4         | 6          |
| Truck                                             | %          | 3              | 1        | 2         | 3          |
| Bicycle                                           | %          | 70             | 28       | 69        | 73         |
| Tricycle/Tuk-Tuk                                  | %          | 3              | 1        | 3         | 3          |
| Motorboat                                         | %          | 5              | 0        | 3         | 8          |
| Motorbike                                         | %          | 87             | 91       | 88        | 86         |
| Refrigerator/freezer                              | %          | 11             | 2        | 12        | 11         |
| Tractor                                           | %          | 3              | 1        | 3         | 3          |
| Hand Tractor                                      | %          | 22             | 26       | 25        | 17         |
| Fumigation backpack                               | %          | 45             | 59       | 45        | 45         |

|                                      |   |    |    |    |    |
|--------------------------------------|---|----|----|----|----|
| Rice thresher                        | % | 5  | 5  | 6  | 4  |
| Microwave oven/microwave             | % |    | 0  | 0  | 1  |
| Radio                                | % | 25 | 21 | 21 | 30 |
| Television                           | % | 71 | 36 | 69 | 75 |
| Computer (laptop or tablet PC, etc.) | % | 4  | 3  | 4  | 5  |
| Mini-component or sound equipment    | % | 28 | 28 | 31 | 26 |
| Washing machine                      | % | 4  | 1  | 3  | 5  |
| Cell phone                           | % | 97 | 86 | 96 | 98 |

**161. Do you have electricity in your house?**

|       |            | Basin location |          |           |            |
|-------|------------|----------------|----------|-----------|------------|
|       |            | Overall        | Upstream | Midstream | Downstream |
| Total | Wtd Base   | 812            | 27       | 427       | 358        |
|       | Unwtd Base | 812            | 270      | 267       | 275        |
| Yes   | %          | 87             | 33       | 91        | 87         |
| No    | %          | 13             | 67       | 9         | 13         |

**162. What is your household's main energy source for 'lighting'?**

|                      |            | Basin location |          |           |            |
|----------------------|------------|----------------|----------|-----------|------------|
|                      |            | Overall        | Upstream | Midstream | Downstream |
| Total                | Wtd Base   | 103            | 18       | 38        | 47         |
|                      | Unwtd Base | 240            | 180      | 24        | 36         |
| Solar                | %          | 77             | 66       | 75        | 83         |
| Home generator       | %          |                | 1        | 0         | 0          |
| Rechargeable battery | %          | 19             | 28       | 17        | 17         |
| Kerosene             | %          | 2              | 1        | 4         | 0          |
| Other                | %          | 2              | 3        | 4         | 0          |

**163. What type of fuel does your household mainly use for cooking?**

|                       |            | Basin location |          |           |            |
|-----------------------|------------|----------------|----------|-----------|------------|
|                       |            | Overall        | Upstream | Midstream | Downstream |
| Total                 | Wtd Base   | 812            | 27       | 427       | 358        |
|                       | Unwtd Base | 812            | 270      | 267       | 275        |
| Electricity           | %          | 1              | 1        | 1         | 1          |
| Natural gas (Bio-Gas) | %          |                | 1        |           |            |
| LPG gas for cooking   | %          | 21             | 14       | 20        | 24         |
| Wood/fuel sticks      | %          | 75             | 80       | 77        | 72         |
| Straw/shrubs/grass    | %          |                |          |           | 0          |
| Other                 | %          | 2              | 4        | 1         | 3          |

**164. How does your household usually dispose of garbage?**

|                                               |            | Basin location |          |           |            |
|-----------------------------------------------|------------|----------------|----------|-----------|------------|
|                                               |            | Overall        | Upstream | Midstream | Downstream |
| Total                                         | Wtd Base   | 812            | 27       | 427       | 358        |
|                                               | Unwtd Base | 812            | 270      | 267       | 275        |
| Collected by informal service provider        | %          | 1              | 1        | 0         | 2          |
| Disposed of in designated waste disposal area | %          | 2              | 0        | 2         | 3          |
| Disposed of within household yard or plot     | %          | 3              | 2        | 3         | 4          |
| Buried or burned                              | %          | 90             | 92       | 94        | 85         |
| Disposed of elsewhere                         | %          | 3              | 5        | 1         | 5          |

**165. What is/are the material(s) used on the walls of the house?**

|                                                |            | Basin location |          |           |            |
|------------------------------------------------|------------|----------------|----------|-----------|------------|
|                                                |            | Overall        | Upstream | Midstream | Downstream |
| Total                                          | Wtd Base   | 812            | 27       | 427       | 358        |
|                                                | Unwtd Base | 812            | 270      | 267       | 275        |
| Brick/Concrete/cement/stone                    | %          | 12             | 3        | 10        | 15         |
| Bamboo/thatch/leaves/grass                     | %          | 6              | 1        | 4         | 8          |
| Clay/dung with straw                           | %          |                | 0        | 0         | 1          |
| Wood/logs/plywood                              | %          | 63             | 94       | 69        | 54         |
| Galvanized iron or aluminum/other metal sheets | %          | 19             | 3        | 15        | 23         |
| Other                                          | %          | 1              |          | 1         | 0          |

**166. What is the most common material on the roof of the house?**

|                                                |            | Basin location |          |           |            |
|------------------------------------------------|------------|----------------|----------|-----------|------------|
|                                                |            | Overall        | Upstream | Midstream | Downstream |
| Total                                          | Wtd Base   | 812            | 27       | 427       | 358        |
|                                                | Unwtd Base | 812            | 270      | 267       | 275        |
| Concrete/fibrous cement                        | %          | 1              | 0        |           | 1          |
| Bamboo/thatch/leaves/grass                     | %          | 1              | 2        | 1         | 1          |
| Plastic sheets/salvage materials               | %          |                |          | 0         |            |
| Galvanized iron or aluminum/other metal sheets | %          | 36             | 58       | 36        | 35         |
| Tile                                           | %          | 55             | 35       | 55        | 56         |
| Fipro                                          | %          | 7              | 4        | 7         | 7          |
| Other                                          | %          |                | 0        |           | 0          |

**167. What is/are the material(s) on the floor of the house?**

|  |  |  |  |  |  |
|--|--|--|--|--|--|
|  |  |  |  |  |  |
|--|--|--|--|--|--|

|                     |               | Basin location |          |           |                |
|---------------------|---------------|----------------|----------|-----------|----------------|
|                     |               | Overall        | Upstream | Midstream | Downstre<br>am |
| Total               | Wtd Base      | 812            | 27       | 427       | 358            |
|                     | Unwtd<br>Base | 812            | 270      | 267       | 275            |
| Mud/clay            | %             | 3              | 4        | 3         | 3              |
| Concrete/ cement    | %             | 8              | 8        | 9         | 6              |
| Tile/ceramic/mosaic | %             | 8              | 3        | 6         | 11             |
| Brick               | %             |                | 0        | 0         |                |
| Wood                | %             | 71             | 85       | 76        | 64             |
| Other               | %             | 10             | 0        | 6         | 15             |
